# Supplementary material for: Derivatization of sumanenetrione through Lewis acid-mediated Suzuki–Miyaura coupling and an unprecedented ring opening
Source: Royal Society of Chemistry journal article supplement (doi:10.1039/d3cc00394a), 2023-01-01
Supplement: d3cc00394a1.pdf [file d3cc00394a1.pdf]

Supporting Information

**Derivatization of Sumanenetrione through Lewis acid-mediated Suzuki-Miyaura coupling and an unprecedented ring opening**

Junyi Han,<sup>a</sup> Yuta Uetake,<sup>a,b</sup> Yumi Yakiyama<sup>a,b</sup> and Hidehiro Sakurai<sup>a,b</sup>

<sup>a</sup>Division of Applied Chemistry, Graduate School of Engineering, Osaka University, 2-1 Yamadaoka, Suita, Osaka 565-0871, Japan.

<sup>b</sup>Innovative Catalysis Science Division, Institute for Open and Transdisciplinary Research Initiatives (ICS-OTRI), Osaka University, 2-1 Yamadaoka, Suita, Osaka 565-0871, Japan

**Content**

|                                  |     |
|----------------------------------|-----|
| 1) General Methods               | S2  |
| 2) Synthesis and NMR spectra     | S2  |
| 3) Supporting Figures and Tables | S16 |
| 4) Computational Experiments     | S19 |
| 5) References                    | S26 |

## 1) General Methods

All the chemical reagents and solvents were commercially purchased and purified according to the standard methods, if necessary. Air- and moisture-sensitive reactions were carried out using commercially available anhydrous solvents under inert atmosphere of nitrogen. Unless otherwise noted.  $^1\text{H}$  and  $^{13}\text{C}$  NMR spectra were recorded on a JEOL JNM-ECS400 and Bruker AVANCE III 600 spectrometers. Chemical shift ( $\delta$ ) are expressed relative to the resonances of the residual non-deuterated solvent for  $^1\text{H}$  ( $\text{CDCl}_3$ :  $^1\text{H}(\delta) = 7.26$  ppm,  $\text{THF-}d_8$ :  $^1\text{H}(\delta) = 3.58, 1.72$  ppm,  $\text{DMSO-}d_6$ :  $^1\text{H}(\delta) = 2.50$  ppm) and for  $^{13}\text{C}$  ( $\text{CDCl}_3$ :  $^{13}\text{C}(\delta) = 77.0$  ppm,  $\text{THF-}d_8$ :  $^{13}\text{C}(\delta) = 67.21, 25.31$  ppm). High resolution mass spectra (HRMS) were measured using electron impact (EI) methods on JEOL JMS-777V spectrometer. Recycling preparative high-performance liquid chromatography (HPLC) was performed by a LC-908W (Japan Analytical Industry Co., Ltd.) with high-resolution gel permeation chromatography (GPC) column (Japan Analytical Industry Co., Ltd., JAIGEL-1H and 2H) with  $\text{CHCl}_3$  as an eluent. The preparative TLC (PTLC) purification was conducted using Wako gel B-5F PTLC plates. Flash column chromatography was prepared using Kanto Silica gel 60N (neutral, spherical, 40-50  $\mu\text{m}$ ) and performed with a Yamazen preparative medium pressure liquid chromatography system. UV-vis spectra were recorded on a JASCO V-670 spectrophotometer. Steady-state emission spectra were recorded on a JASCO FP-6500DS spectrometer. Melting points were determined on an Optimelt MPA100 automated melting point apparatus (Stanford Research Systems, Inc.), and expressed without correction. Infrared (IR) absorption spectra were measured by attenuated total reflection (ATR) method on a JASCO FT/IR-4100 Fourier transform IR spectrometer equipped with a JASCO ATR PRO ONE single reflection ATR optical attachment and a diamond crystal plate.

## 2) Synthesis and NMR spectra

### a) Synthesis of Bromosumanenetrione (2)

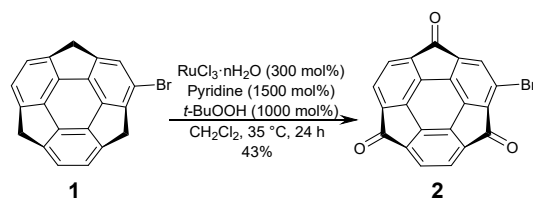

Scheme S1. Synthetic route to 2.

### 2-bromo-1H-tricyclopenta[def,jkl,pqr]triphenylene-1,4,7-trione (2)

To a  $\text{CH}_2\text{Cl}_2$  (11 mL) solution of bromosumanene<sup>S1</sup> (34.4 mg, 0.10 mmol) in 30 mL round-bottomed flask was added pyridine (1.2 mL, 15.25 mmol),  $\text{RuCl}_3 \cdot n\text{H}_2\text{O}$  (85 mg, 0.33 mmol), and a 70% aqueous solution of *t*-BuOOH (1.0 mL, 7.78 mmol) at room temperature. The reaction mixture was warmed to 35 °C. After being stirred for 24 h. The reaction mixture was diluted by  $\text{CH}_2\text{Cl}_2$  at rt, filtered through silica pad, and evaporated. The residue was purified by PTLC ( $\text{CH}_2\text{Cl}_2$ ) to give bromosumanenetrione 2 (16.6 mg, 43% yield) as an orange solid.

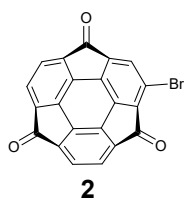

**2:** mp: 267 °C (dec.); TLC:  $R_f = 0.45$  ( $\text{CH}_2\text{Cl}_2$ );  $^1\text{H}$  NMR (400 MHz,  $\text{CDCl}_3$ )  $\delta$  (ppm) 7.52 (s, 1H), 7.49 (d,  $J = 7.4$  Hz, 1H), 7.47 (d,  $J = 7.4$  Hz, 1H), 7.46 (d,  $J = 7.4$  Hz, 1H), 7.43 (d,  $J = 7.3$  Hz, 1H);  $^{13}\text{C}$  NMR (100 MHz, Chloroform- $d$ )  $\delta$  (ppm) 187.95, 186.95, 185.65, 150.30, 149.82, 149.67, 149.38, 147.83, 147.04, 144.73, 143.87, 143.55, 143.40, 143.37, 140.32, 131.21, 127.21, 127.15, 127.01, 126.78, 121.35. IR (ATR):  $\nu$  2974, 2952, 1720, 1636, 1562, 1390, 1366, 1329, 1293, 1266, 1195, 1178, 1073, 947, 857, 842, 774, 734, 723, 697  $\text{cm}^{-1}$ ; HRMS (EI)  $m/z$  Calcd. for  $[\text{C}_{21}\text{H}_5\text{BrO}_3]$  ( $\text{M}^+$ ): 383.9422, found 383.9410.

b) Optimization of the reaction conditions in Suzuki-Miyaura cross coupling

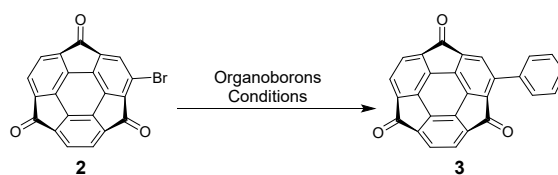

**Scheme S2.** Synthetic approach to **3**.

**Table S1** Optimization of the reaction conditions in Suzuki-Miyaura cross coupling.

| Entry | Organoborons                                                                                   | Conditions <sup>a</sup>                                                                                                         | Yield |
|-------|------------------------------------------------------------------------------------------------|---------------------------------------------------------------------------------------------------------------------------------|-------|
| 1     | 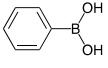 (120 mol%) | $\text{Pd}(\text{PPh}_3)_4$ (10 mol%)<br>$\text{K}_2\text{CO}_3$ (100 mol%)<br>THF/ $\text{H}_2\text{O}$ , 80 °C, 1 h           | 0     |
| 2     |  (120 mol%) | $\text{Pd}(\text{PPh}_3)_4$ (10 mol%)<br>$\text{CsF}$ (100 mol%)<br>toluene/ $\text{H}_2\text{O}$ , 80 °C, 1 h                  | 0     |
| 3     |  (120 mol%) | $\text{Pd}(\text{OAc})_2$ (10 mol%)<br>ChOH/ $\text{H}_2\text{O}$ , 100 °C, 1 h                                                 | 0     |
| 4     |  (100 mol%) | $\text{PdCl}_2(\text{dppf})$ (10 mol%)<br>toluene, reflux, 1 h                                                                  | 0     |
| 5     |  (100 mol%) | $\text{Pd}(\text{OAc})_2$ (10 mol%)<br>DMF, 80 °C, 1 h                                                                          | 0     |
| 6     |  (120 mol%) | $\text{PdCl}_2(\text{amphos})_2$ (2 mol%)<br>$((\text{tmeda})\text{Zn}(\text{OH})(\text{OTf}))_3$ (150 mol%)<br>THF, 80 °C, 1 h | 89%   |

<sup>a</sup> **2** (0.050 mmol), solvent (2mL). <sup>b</sup> ChOH: choline hydroxide

**2-phenyl-1H-tricyclopenta[def,jkl,pqr]triphenylene-1,4,7-trione (3)**

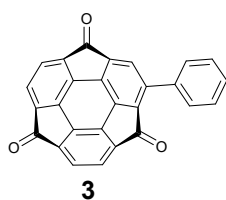

**3:** mp: 312 °C (dec.); TLC:  $R_f = 0.65$  ( $\text{CH}_2\text{Cl}_2$ );  $^1\text{H}$  NMR (600 MHz, Chloroform- $d$ )  $\delta$  (ppm) 7.63 (s, 1H), 7.63 (m, 2H), 7.49 (m, 3H), 7.45 (d,  $J = 7.6$  Hz, 1H), 7.42 (d,  $J = 7.4$  Hz, 1H), 7.40 (d,  $J = 7.4$  Hz, 1H), 7.35 (d,  $J = 7.3$  Hz, 1H);  $^{13}\text{C}$  NMR (100 MHz, Chloroform- $d$ )  $\delta$  (ppm) 188.54, 188.38, 186.91, 150.32, 150.15, 149.92, 149.27, 149.18, 147.42, 144.58, 144.29, 143.97, 143.91, 143.71, 143.44, 138.36,

135.69, 130.06, 129.98, 128.62, 127.18, 126.77, 126.62, 126.48, 126.37. IR (ATR):  $\nu$  3057, 2961, 2923, 2852, 1717, 1633, 1562, 1450, 1397, 1343, 1262, 1176, 1071, 1027, 950, 908, 853, 742, 729, 693  $\text{cm}^{-1}$ ; HRMS (EI)  $m/z$  Calcd. for  $[\text{C}_{27}\text{H}_{10}\text{O}_3]$  ( $\text{M}^+$ ): 382.0630, found 382.0622.

c) Synthesis of sumanenetrione derivatives 4-8

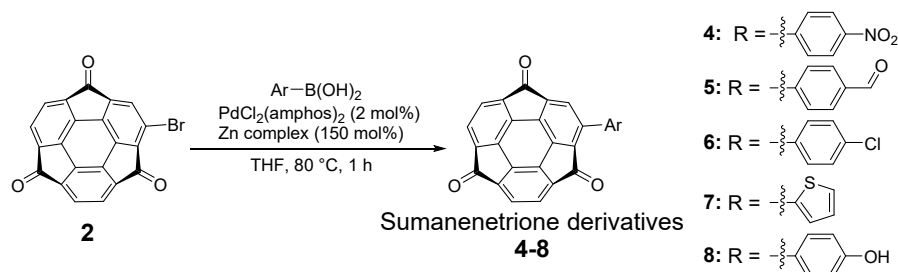

**Scheme S3.** Synthetic route to the sumanenetrione derivatives 4-8.

To a test tube equipped with a magnetic stir bar was added **2** (0.050 mmol, 1 equiv), organo boronic acid (0.060 mmol, 1.2 equiv),  $\text{PdCl}_2(\text{amphos})_2$  (0.7 mg, 0.5  $\mu\text{mol}$ , 0.02 equiv),  $((\text{tmeda})\text{Zn}(\text{OH})(\text{OTf}))_3$  (0.075 mmol/ $\text{Zn}$ , 1.5 equiv/ $\text{Zn}$ )<sup>S2</sup>, and THF (2.0 mL). The reaction mixture was stirred for 1 h at 80 °C and then cooled to room temperature. The mixture was extracted with DCM (ca. 20 mL  $\times$  3). The combined organic extract was dried over  $\text{Na}_2\text{SO}_4$ , filtered, and concentrated under reduced pressure. The residue was purified by PTLC ( $\text{CH}_2\text{Cl}_2$ ) to give the corresponding products. Further purification was conducted with GPC by using  $\text{CHCl}_3$  as an eluent.

**2-(4-nitrophenyl)-1H-tricyclopenta[def,jkl,pqr]triphenylene-1,4,7-trione (4)**

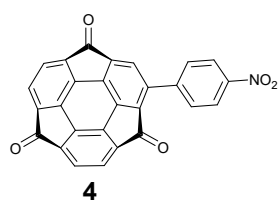

**4:** mp: 344 °C (dec.); TLC:  $R_f$  = 0.65 ( $\text{CH}_2\text{Cl}_2$ );  $^1\text{H}$  NMR (600 MHz, Chloroform- $d$ )  $\delta$  (ppm) 8.35 (d,  $J$  = 8.2 Hz, 2H), 7.79 (d,  $J$  = 8.3 Hz, 2H), 7.62 (s, 1H), 7.49 (d,  $J$  = 7.5 Hz, 1H), 7.46 (d,  $J$  = 7.6 Hz, 1H), 7.44 (d,  $J$  = 7.6 Hz, 1H), 7.39 (d,  $J$  = 7.6 Hz, 1H);  $^{13}\text{C}$  NMR (100 MHz, Chloroform- $d$ )  $\delta$  (ppm) 188.08, 187.87, 186.74, 150.05, 149.98, 149.68, 149.50, 149.20, 148.59, 148.50, 143.95, 143.90,

143.88, 143.78, 143.73, 143.64, 141.81, 141.28, 139.05, 130.84, 127.02, 126.99, 126.84, 126.73, 123.84. IR (ATR):  $\nu$  2959, 2923, 2851, 1718, 1518, 1346, 1259, 1087, 1015, 947, 855, 795, 742, 731, 693  $\text{cm}^{-1}$ ; HRMS (EI)  $m/z$  Calcd. for  $[\text{C}_{27}\text{H}_9\text{NO}_5]$  ( $\text{M}^+$ ): 427.0481, found 427.0475.

**4-(1,4,7-trioxo-4,7-dihydro-1H-tricyclopenta[def,jkl,pqr]triphenylene-2-yl)benzaldehyde (5)**

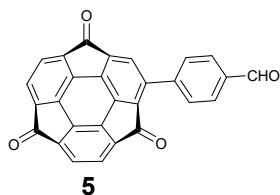

**5:** mp: 323 °C (dec.). TLC:  $R_f$  = 0.20 ( $\text{CH}_2\text{Cl}_2$ ).  $^1\text{H}$  NMR (600 MHz, Chloroform- $d$ )  $\delta$  10.10 (s, 1H), 8.01 (d,  $J$  = 7.8 Hz, 2H), 7.80 (d,  $J$  = 7.8 Hz, 2H), 7.65 (s, 1H), 7.47 (d,  $J$  = 7.5 Hz, 1H), 7.45 (d,  $J$  = 7.5 Hz, 1H), 7.43 (d,  $J$  = 7.3 Hz, 1H), 7.38 (d, 7.3 Hz, 1H).  $^{13}\text{C}$  NMR (100 MHz,  $\text{CDCl}_3$ )  $\delta$  (ppm) 191.81, 188.24, 188.05, 186.80, 150.13, 149.96, 149.83, 149.44, 149.21, 148.19, 144.01, 143.90,

143.84, 143.79, 143.58, 142.60, 141.41, 138.90, 136.97, 130.63, 129.86, 127.02, 126.94, 126.87, 126.80, 126.72. IR (ATR):  $\nu$  2955, 2922, 2853, 1717, 1632, 1640, 1567, 1460, 1447,

1396, 1369, 1342, 1285, 1260, 1226, 1196, 1177, 1110, 1053, 1018, 950, 845, 743, 727 cm<sup>-1</sup>. HRMS (EI) m/z Calcd. for [C<sub>28</sub>H<sub>10</sub>O<sub>4</sub><sup>+</sup>] (M<sup>+</sup>): 410.0579, found 410.0583.

### 2-(4-chlorophenyl)-1H-tricyclopenta[def,jkl,pqr]triphenylene-1,4,7-trione (6)

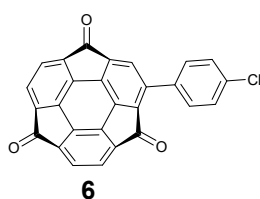

**6:** mp: 333 °C (dec.). TLC: R<sub>f</sub> = 0.55 (CH<sub>2</sub>Cl<sub>2</sub>). <sup>1</sup>H NMR (600 MHz, Chloroform-*d*) δ 7.58 (s, 1H), 7.57 (d, *J* = 8.5 Hz, 2H), 7.46 (d, *J* = 8.4 Hz, 2H), 7.45 (d, *J* = 7.7 Hz, 1H), 7.42 (d, *J* = 7.7 Hz, 1H), 7.41 (d, *J* = 7.6 Hz, 1H), 7.37 (d, *J* = 7.6 Hz, 1H). <sup>13</sup>C NMR (151 MHz, Chloroform-*d*) δ (ppm) 188.39, 188.19, 186.86, 150.28, 150.04, 149.93, 149.30, 149.13, 147.61, 144.17, 143.91, 143.87, 143.83, 143.50, 143.07, 138.32, 136.37, 134.05, 131.21, 128.93, 126.84, 126.79, 126.72, 126.60, 126.51. IR (ATR): ν 2956, 2922, 2853, 1716, 1625, 1591, 1485, 1377, 1260, 1177, 1091, 1041, 1013, 947, 854, 831, 745, 731, 696 cm<sup>-1</sup>. HRMS (EI) m/z Calcd. for [C<sub>27</sub>H<sub>9</sub>ClO<sub>3</sub><sup>+</sup>] (M<sup>+</sup>): 416.0240, found 416.0248.

### 2-(thiophen-2-yl)-1H-tricyclopenta[def,jkl,pqr]triphenylene-1,4,7-trione (7)

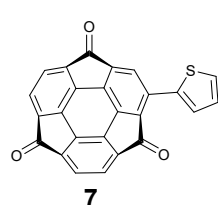

**7:** mp: 345 °C (dec.). TLC: R<sub>f</sub> = 0.45 (CH<sub>2</sub>Cl<sub>2</sub>). <sup>1</sup>H NMR (600 MHz, Chloroform-*d*) δ 8.03 (d, *J* = 3.7 Hz, 1H), 7.70 (s, 1H), 7.50 (d, *J* = 4.9 Hz, 1H), 7.45 (d, *J* = 7.9 Hz, 1H), 7.43 (d, *J* = 7.9 Hz, 1H), 7.42 (d, *J* = 7.5 Hz, 1H), 7.40 (d, *J* = 7.4 Hz, 1H), 7.23 (dd, *J* = 4.9, 3.7 Hz, 1H). <sup>13</sup>C NMR (151 MHz, Chloroform-*d*) δ (ppm) 188.54, 188.06, 186.70, 151.09, 150.28, 150.12, 149.78, 148.98, 148.74, 148.52, 146.08, 143.98, 143.86, 143.33, 138.85, 137.01, 136.13, 132.57, 129.07, 128.70, 126.86, 126.75, 126.52, 126.48, 126.15. IR (ATR): ν 2953, 2923, 2852, 1717, 1558, 1420, 1283, 1261, 1196, 1177, 1126, 1049, 949, 844, 791, 744, 725, 693 cm<sup>-1</sup>. HRMS (EI) m/z Calcd. for [C<sub>25</sub>H<sub>8</sub>O<sub>3</sub>S<sup>+</sup>] (M<sup>+</sup>): 388.0194, found 388.0189.

### 2-(2-hydroxyphenyl)-1H-tricyclopenta[def,jkl,pqr]triphenylene-1,4,7-trione (8)

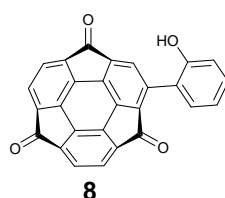

**8:** TLC: R<sub>f</sub> = 0.15 (CH<sub>2</sub>Cl<sub>2</sub>). <sup>1</sup>H NMR (400 MHz, DMSO-*d*<sub>6</sub>) δ (ppm) 9.84 (s, 1H), 7.60 (s, 1H), 7.49 (d, *J* = 7.5 Hz, 1H), 7.44 (d, *J* = 7.5 Hz, 2H), 7.37 (d, *J* = 7.2 Hz, 1H), 7.31 (dd, *J* = 7.6, 1.8 Hz, 1H), 7.27 (ddd, *J* = 7.6, 7.6, 1.8 Hz, 1H), 6.95 (dd, *J* = 7.7, 1.3 Hz, 1H), 6.87 (ddd, *J* = 7.6, 7.6, 1.3 Hz, 1H). IR (ATR): ν 2959, 2920, 2853, 1719, 1456, 1274, 1187, 1123, 1070, 1037, 938, 854, 827, 798, 742 cm<sup>-1</sup>. HRMS (EI) m/z Calcd. for [C<sub>27</sub>H<sub>10</sub>O<sub>4</sub><sup>+</sup>] (M<sup>+</sup>): 398.0579, found 398.0561.

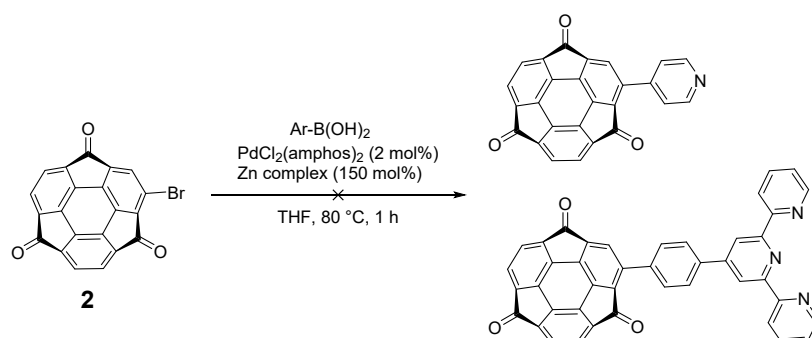

**Scheme S4.** Failed synthesis of pyridine-sumanenetrione derivatives. It is noteworthy that the reaction using pyridylboronic acid or terpyridylphenylboronic under standard conditions gave

recovery of **2** instead of affording the desired products.

$^1\text{H}$  and  $^{13}\text{C}$  NMR spectra of **2**

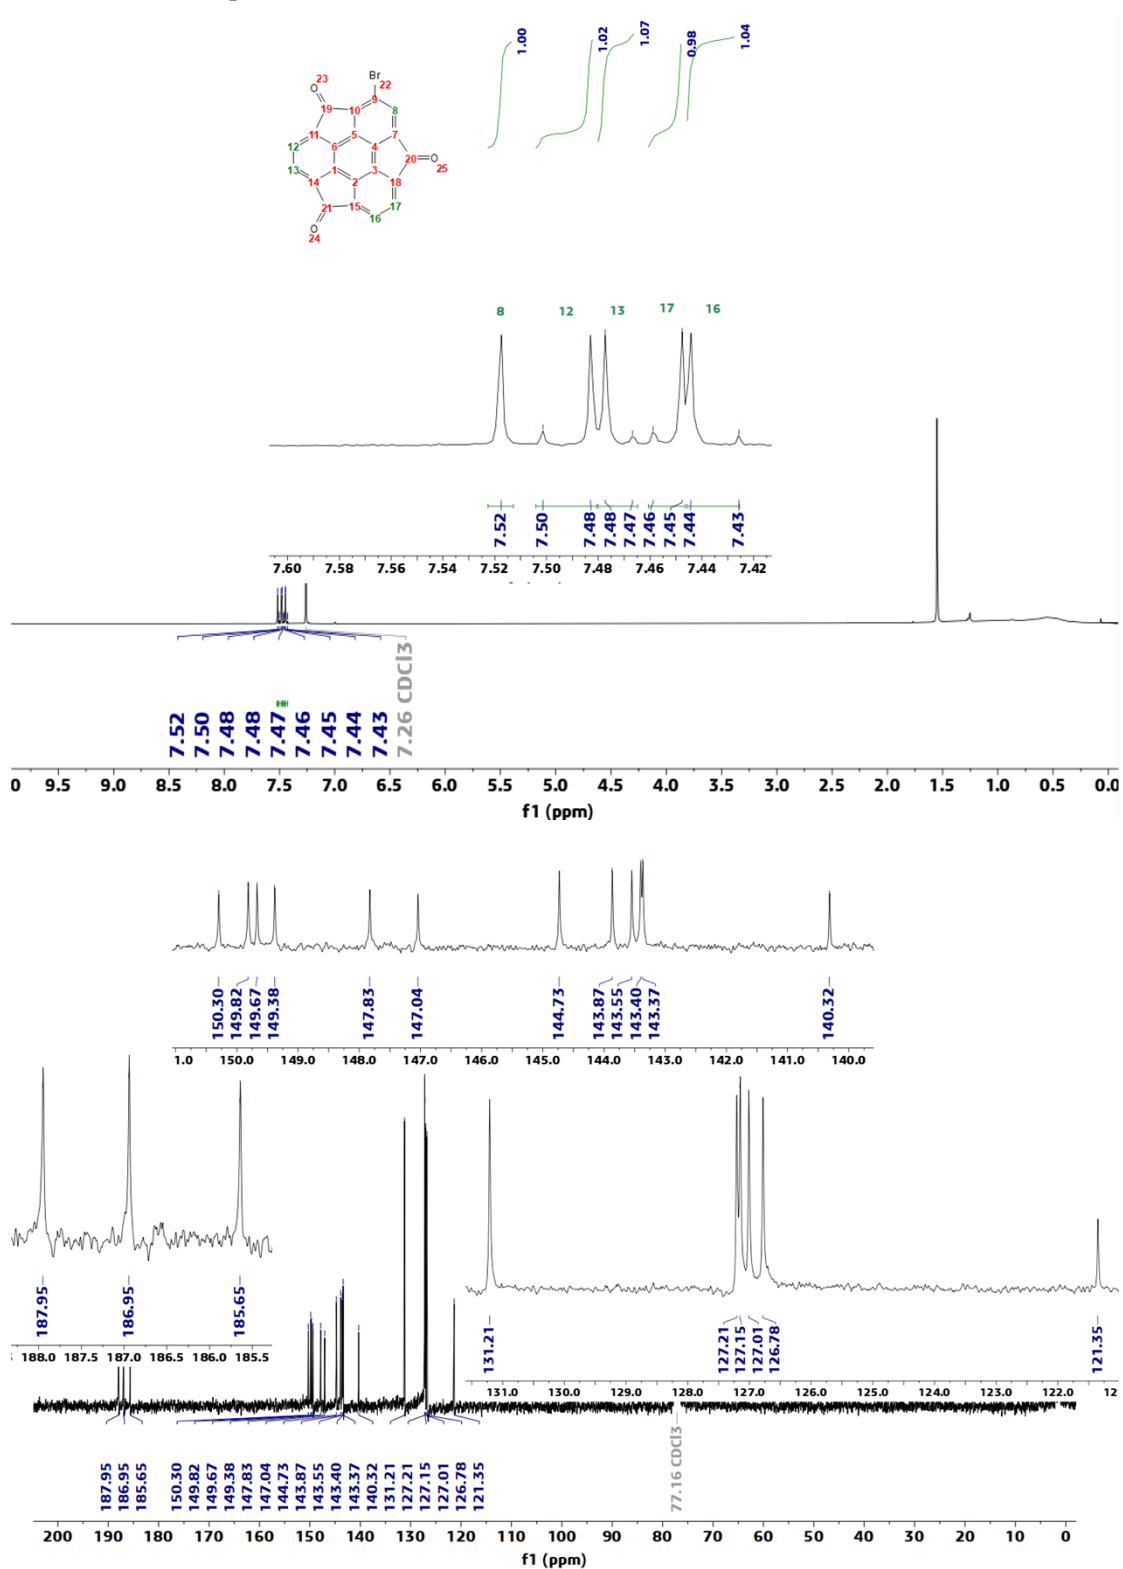

$^1\text{H}$  and  $^{13}\text{C}$  NMR spectra of **3**

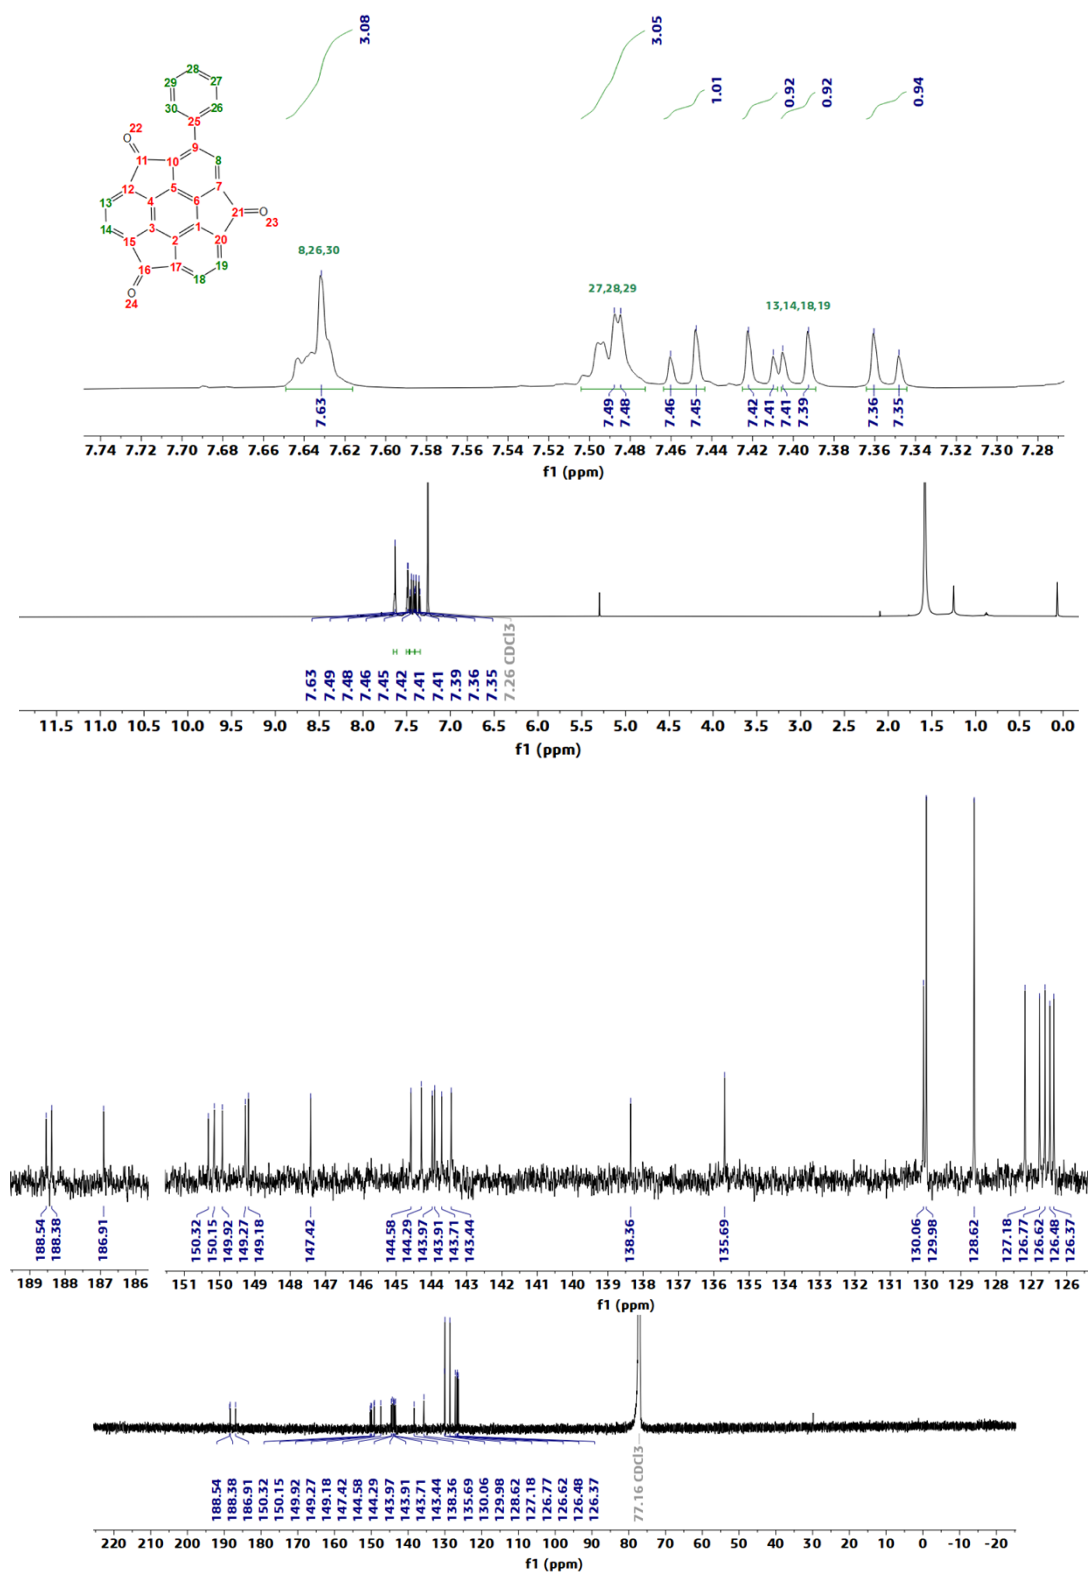



$^1\text{H}$  and  $^{13}\text{C}$  NMR spectra of **4**

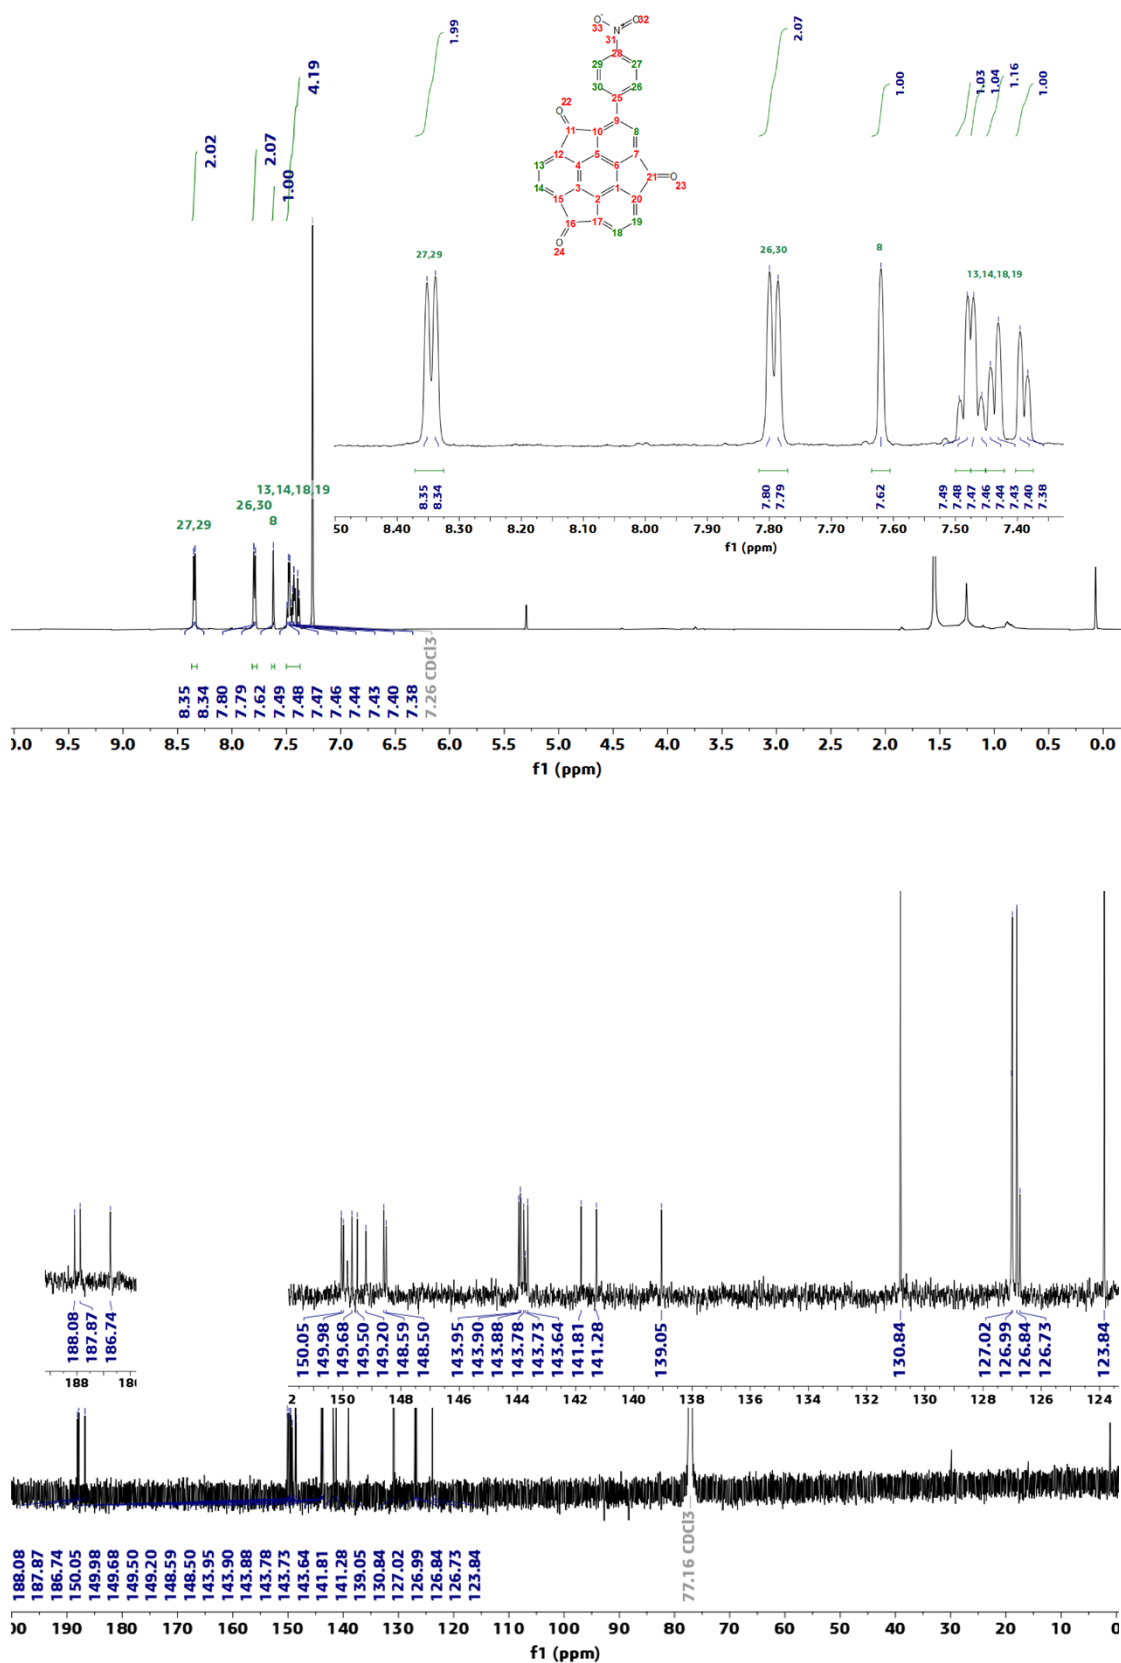

$^1\text{H}$  and  $^{13}\text{C}$  spectra of **5**

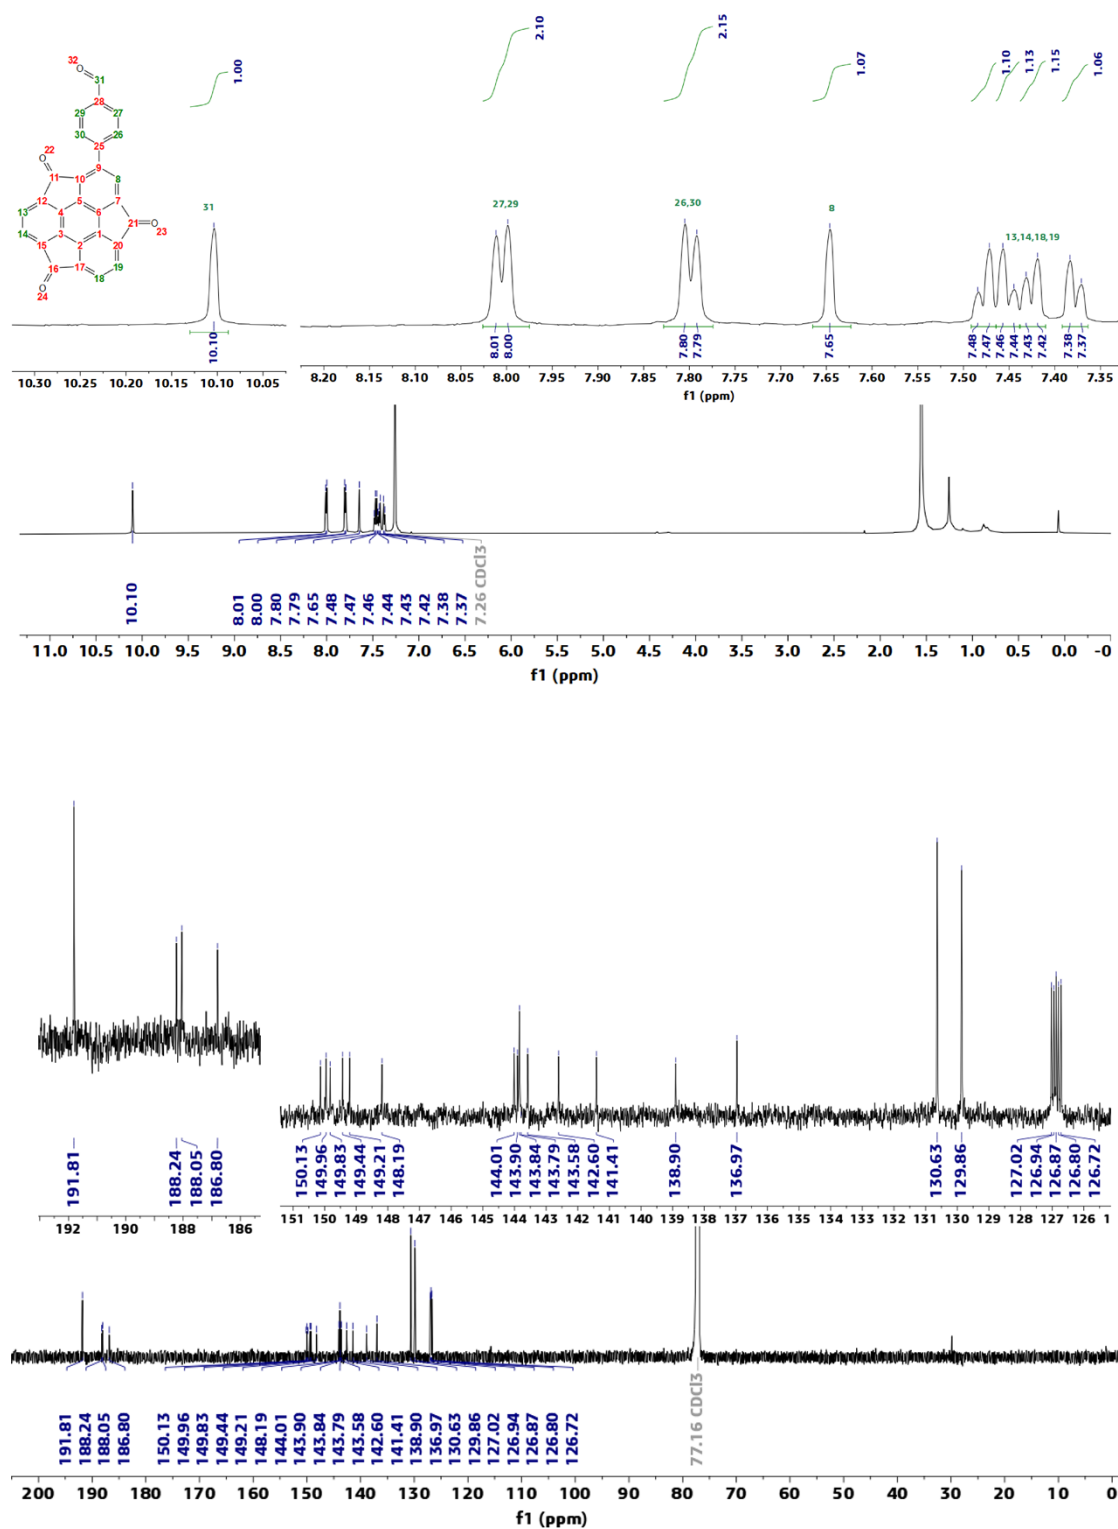

$^1\text{H}$  and  $^{13}\text{C}$  NMR spectra of **6**

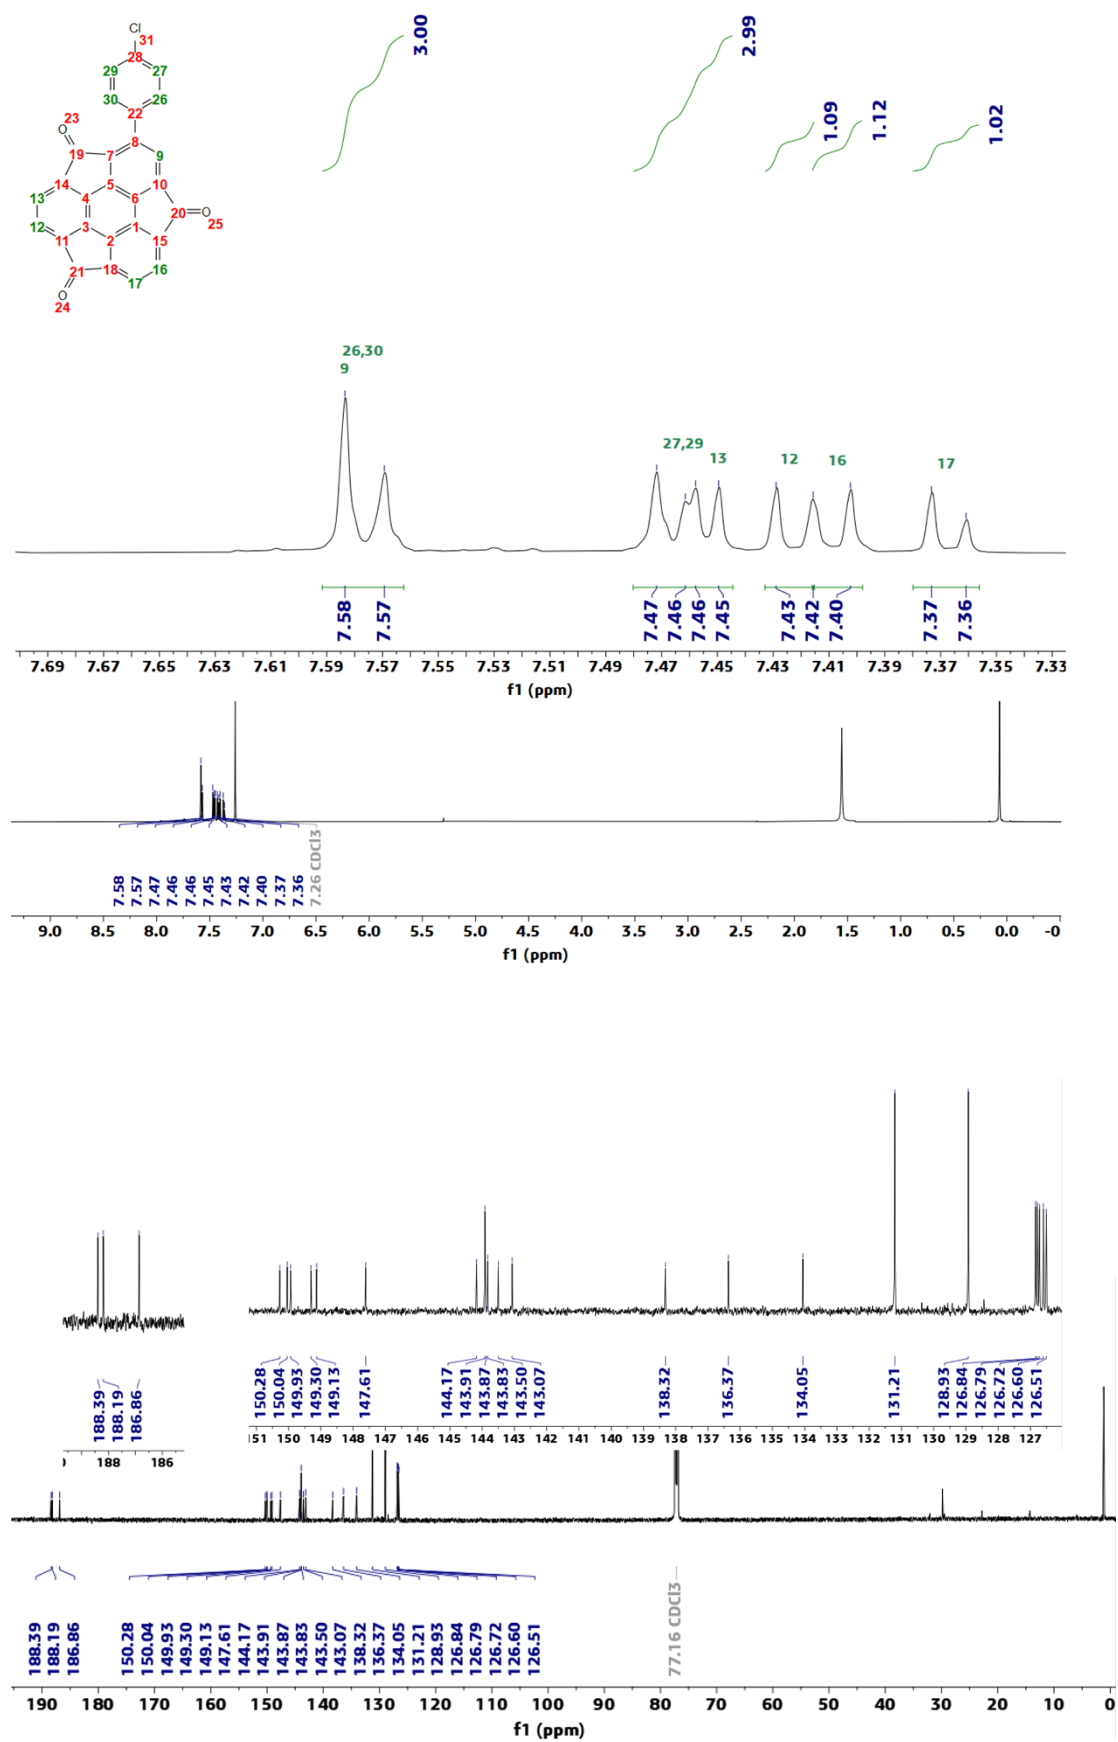

$^1\text{H}$  and  $^{13}\text{C}$  NMR spectra of 7

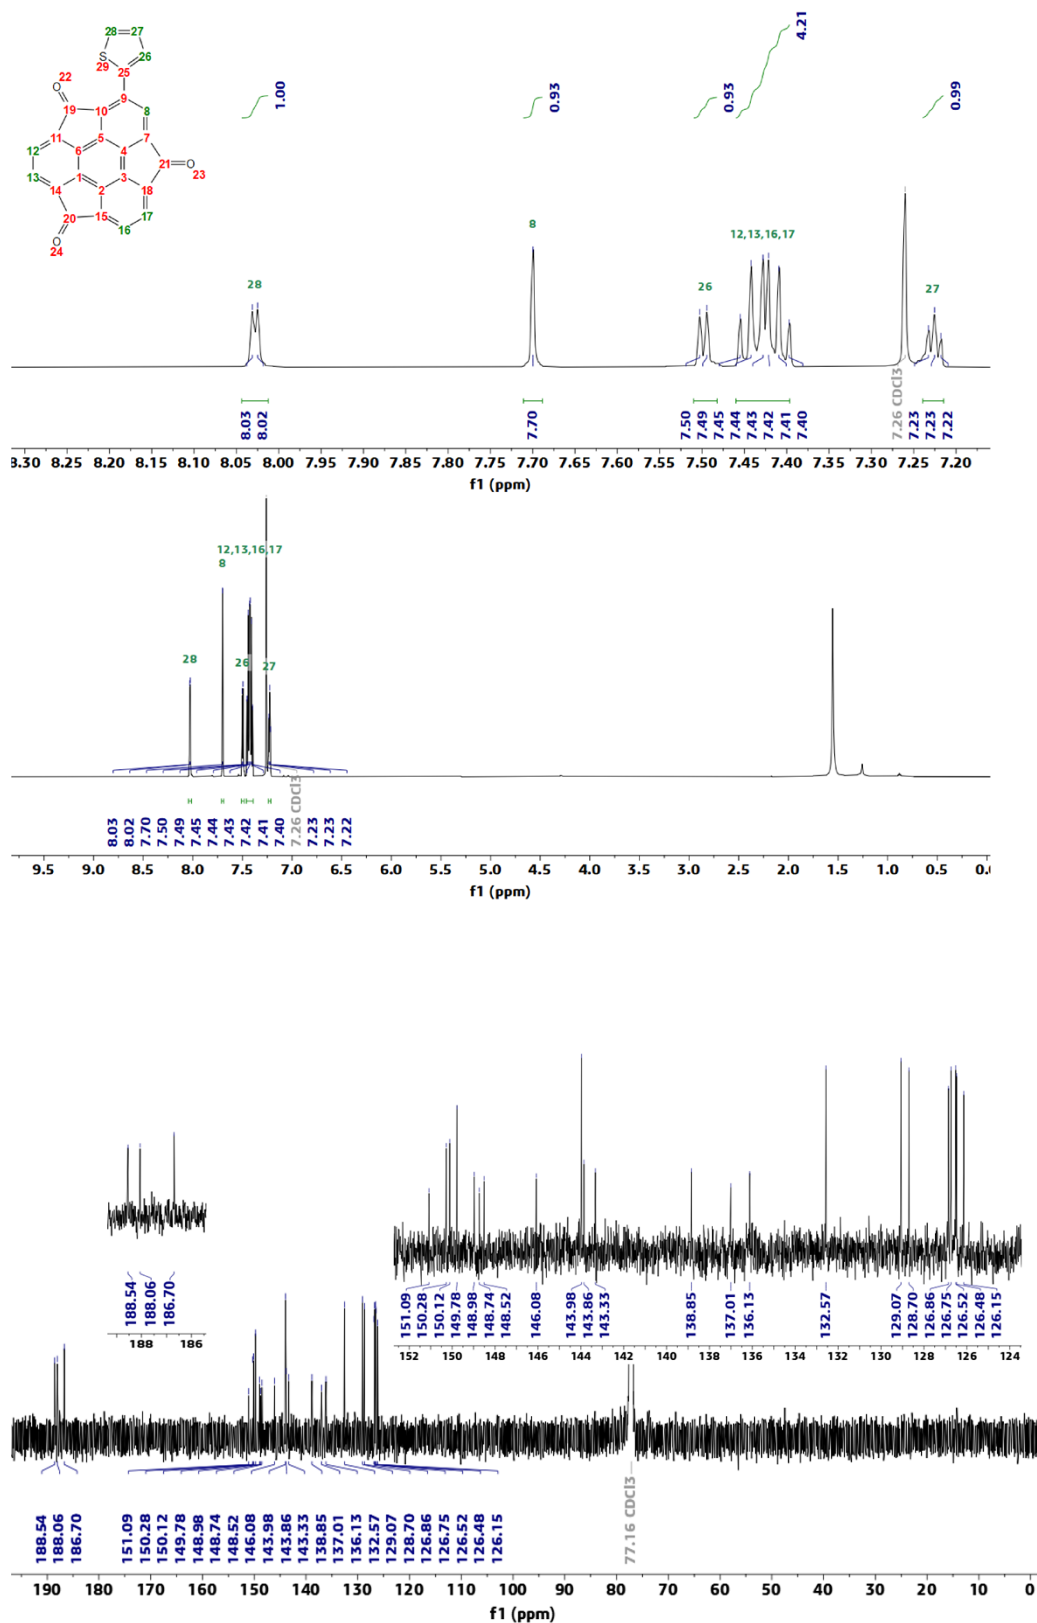

$^1\text{H}$  and  $^{13}\text{C}$  NMR spectra of **8**

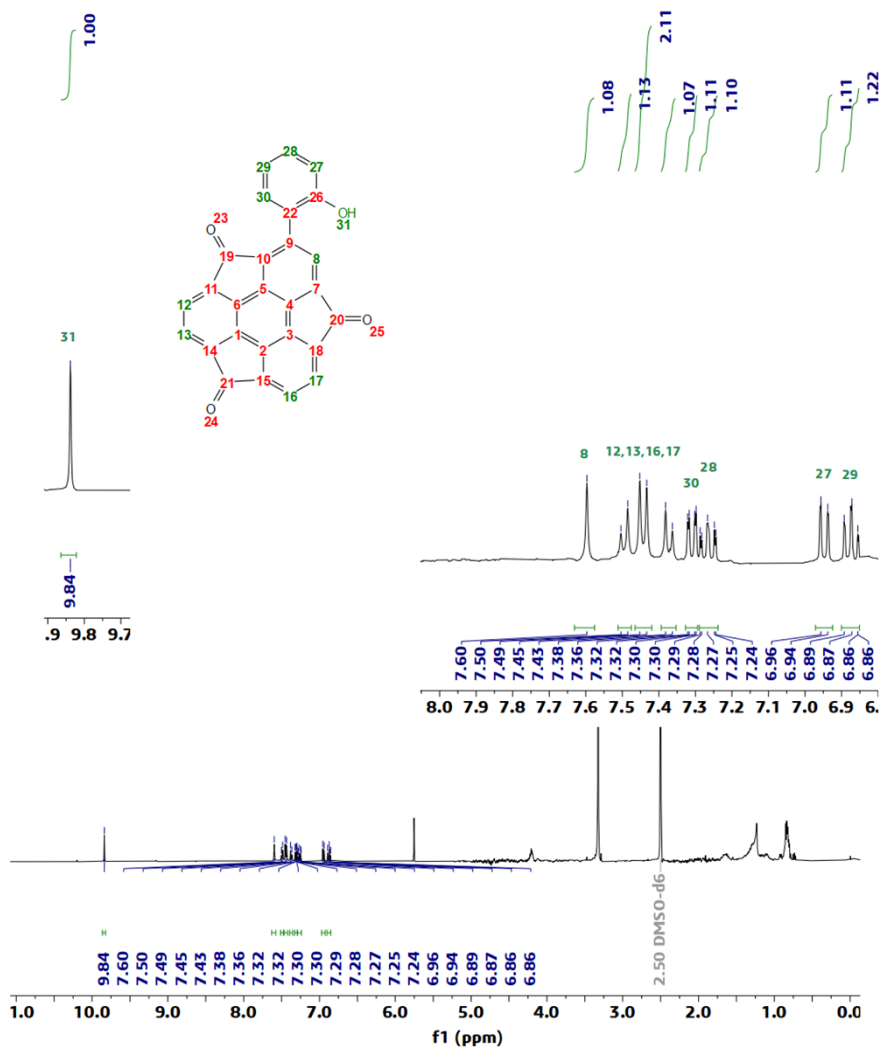

COSY NMR spectrum of **8**

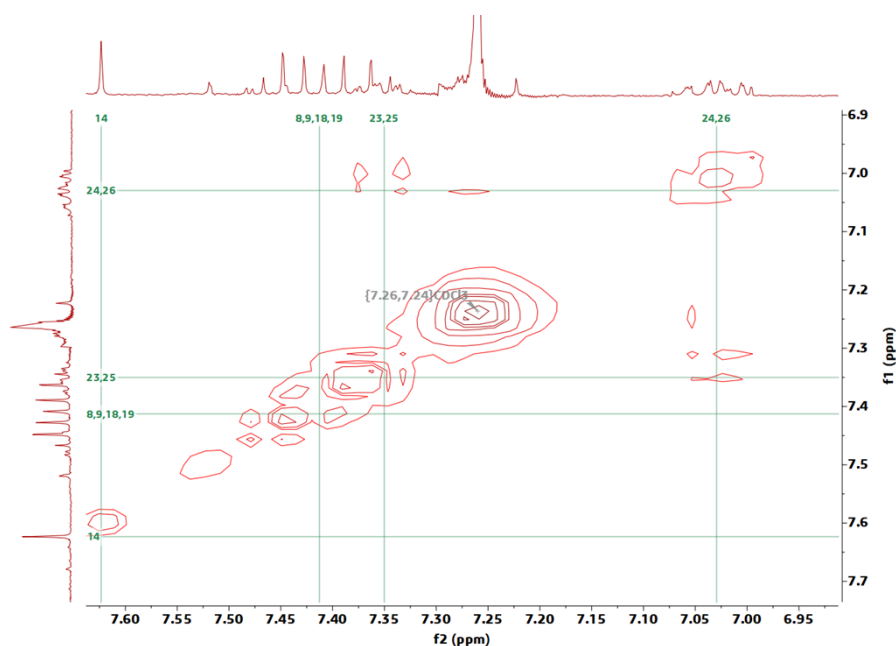

*d) Synthesis of phenylsumanenetrione **3** by Negishi coupling reaction conditions*

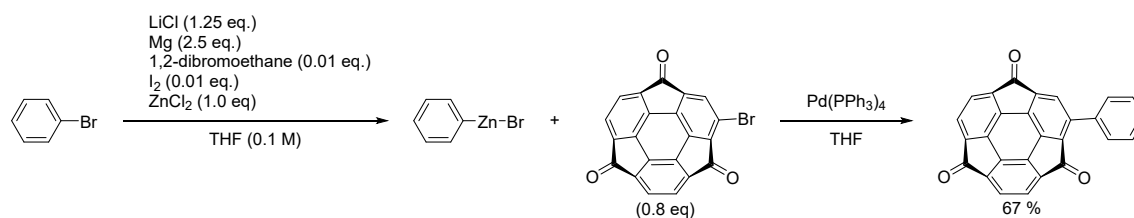

A flask was charged with LiCl (1.25 eq.), and the flask was flame-dried under a vacuum. Upon cooling the flask was backfilled with argon, and Mg turnings (2.5 eq.) were added. THF (0.1M relative to aryl bromide) was added, and the mixture was vigorously stirred. A small amount of 1,2-dibromoethane (ca 0.01 eq.) was added, and the mixture was stirred until effervescence ensued. At this time, a small piece of I<sub>2</sub> (ca 0.01 eq.) was added, and a small amount of PhBr (ca 0.1 eq.) was added. The mixture was stirred until the solution was discolored. The remaining portion of PhBr was added dropwise, and the mixture was stirred for 1 hour prior to titration with I<sub>2</sub>. Concentrations were 0.081M for PhMgBr.

A flask was charged with ZnCl<sub>2</sub>, and the flask was flame-dried under a vacuum. The solution of PhMgBr was then added, and the mixture was stirred for at least 30 minutes. This step was assumed to occur in quantitative yield, and the resulting organozinc reagent was not titrated prior to use in the Negishi coupling reaction. Mixed bromosumanenetrione (0.8 eq.) with Pd(PPh<sub>3</sub>)<sub>4</sub> (ca. 0.01eq) in a test tube filled with N<sub>2</sub>. The organozinc reagent (1 eq.) was added, and the temperature was raised to 80 °C. After 15 mins of stirring. The reaction mixture was washed with water before being extracted with CH<sub>2</sub>Cl<sub>2</sub>, filtered through a silica pad, and evaporated. The residue was purified by PTLC (CH<sub>2</sub>Cl<sub>2</sub>) to give the products phenylsumanenetrione **3** (6.7 mg, 67%).

e) Preparation of ring-opened compound **9**

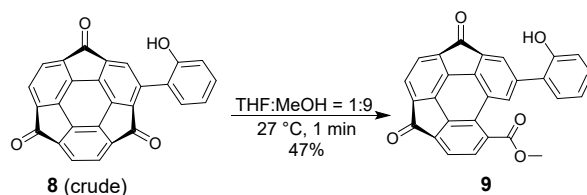

**Scheme S5.** Synthetic route to the **9**.

To a test tube equipped with a magnetic stir bar was added crude **8** (10.0 mg, 0.025 mmol) in a 10 mL mixture of THF/MeOH (1:9) solution at 27 °C. After 1 minute of stirring, the reaction mixture color changed from red to yellow. After the removal of solvent under the reduced pressure, the residue was washed with chloroform and then was purified by PTLC (THF:CH<sub>2</sub>Cl<sub>2</sub>=1:19) to give **9** (5.1 mg, 47% yield) as an orange solid.

**Methyl-6-(2-hydroxyphenyl)-1,8-dioxo-1,8-dihydrodicyclopenta[def,jkl]triphen-ylene-4-carboxylate**  
**(9)**

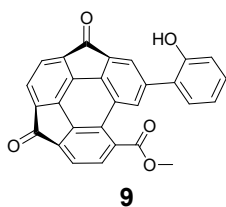

**9**: mp: 223 °C (dec.). TLC: R<sub>f</sub> = 0.45 (THF:CH<sub>2</sub>Cl<sub>2</sub>=1:19). <sup>1</sup>H NMR (600 MHz, THF-*d*<sub>8</sub>) δ 8.82 (s, 1H), 8.60 (s, 1H), 8.11 (s, 1H), 8.07 (d, *J* = 7.5 Hz, 1H), 7.86 (d, *J* = 7.3 Hz, 1H), 7.77 (d, *J* = 7.2 Hz, 1H), 7.75 (d, *J* = 7.0 Hz, 1H), 7.43 (dd, *J* = 7.5, 1.6 Hz, 1H), 7.21 (td, *J* = 7.5, 1.8 Hz, 1H), 6.97 (td, *J* = 7.4, 0.9 Hz, 1H), 6.92 (dd, *J* = 8.1, 0.8 Hz, 1H), 4.05 (s, 3H). <sup>13</sup>C NMR (151 MHz, THF-*d*<sub>8</sub>) δ 191.39, 190.83, 169.14, 155.66, 142.99, 140.14, 138.75, 138.42, 137.48, 136.93, 136.58, 136.20, 135.68, 134.88, 133.43, 131.97, 130.08, 129.72, 129.69, 127.65, 126.77, 126.52, 126.22, 125.48, 124.05, 121.01, 117.11, 53.23. IR (ATR): ν 3423, 2953, 2928, 2856, 1714, 1632, 1601, 1453, 1369, 1337, 1267, 1185, 1101, 1036, 907, 857, 808, 755, 727 cm<sup>-1</sup>. HRMS (EI) *m/z* Calcd. for [C<sub>28</sub>H<sub>14</sub>O<sub>5</sub><sup>+</sup>] (M<sup>+</sup>): 430.0841, found 430.0855.

$^1\text{H}$  and  $^{13}\text{C}$  NMR spectrum of **9**

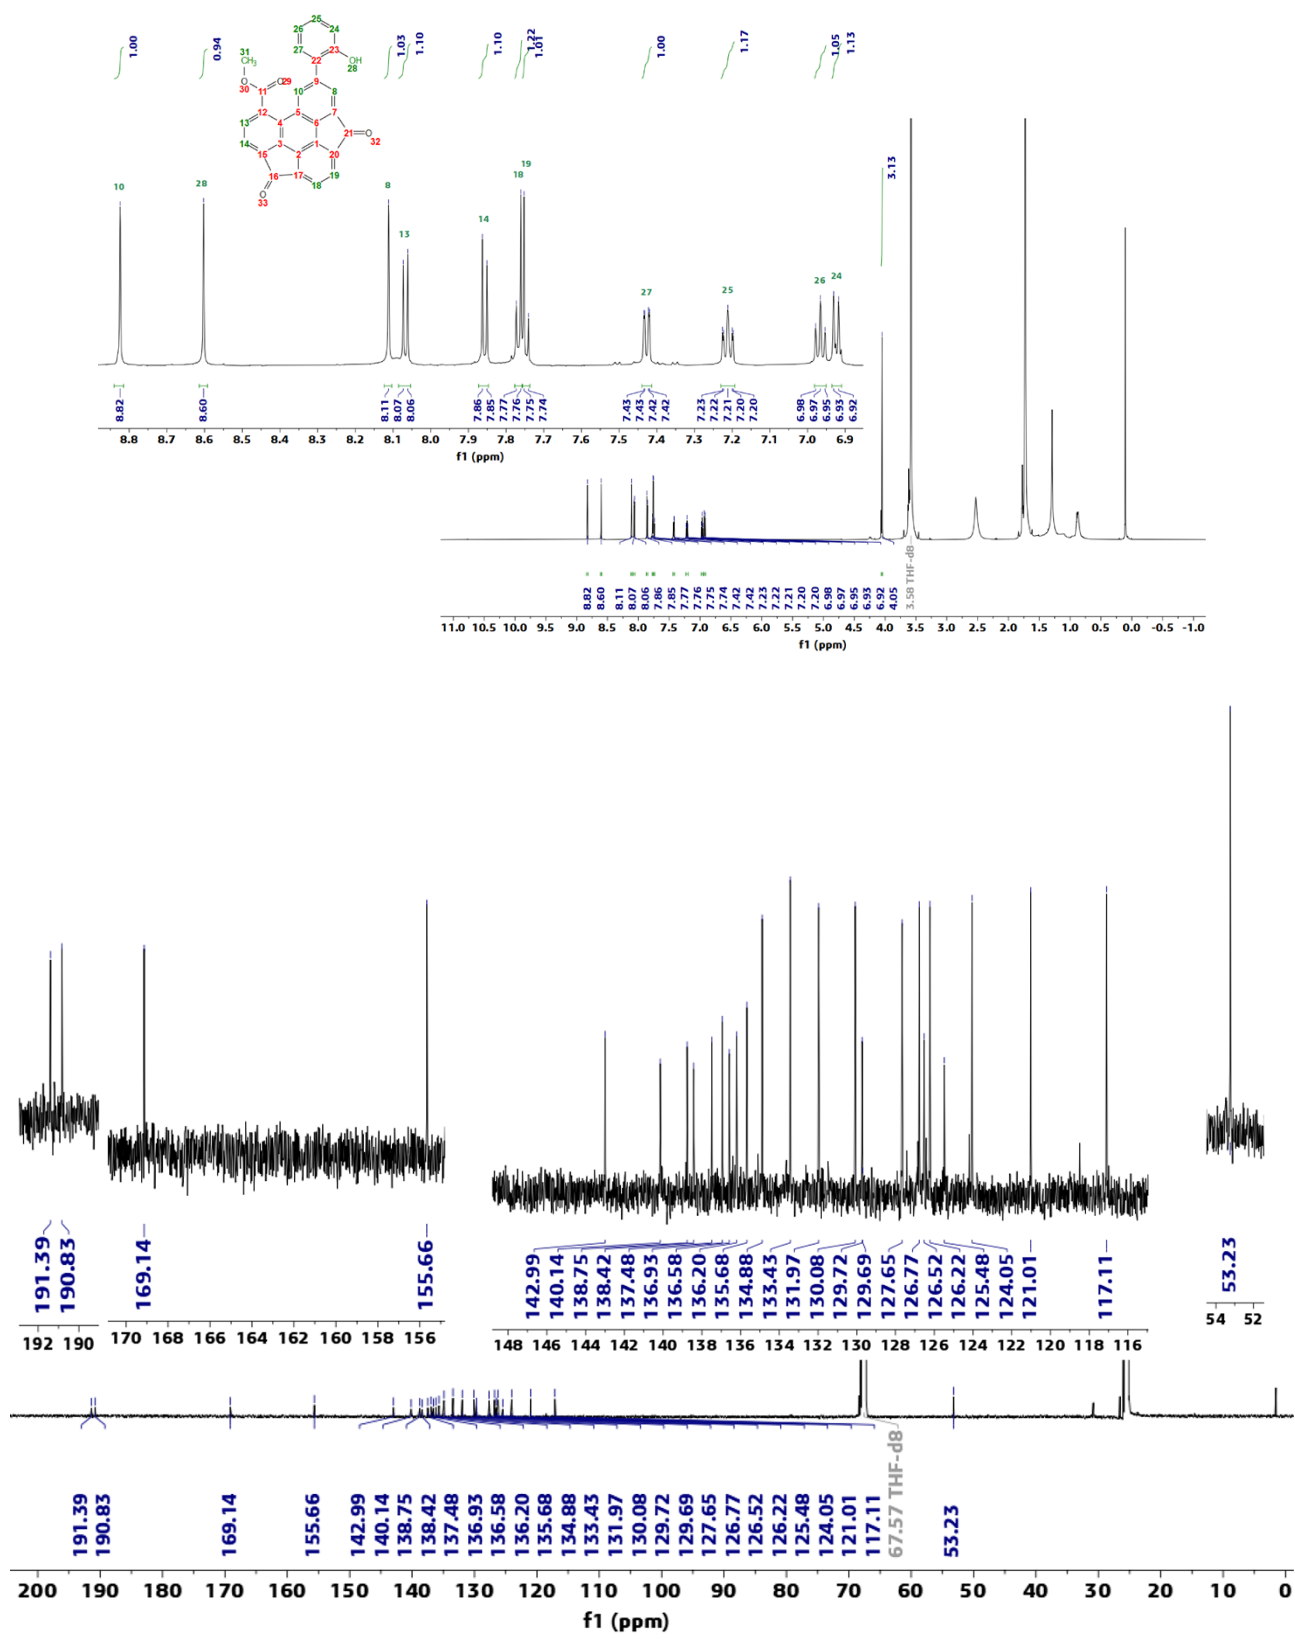



## Lippert Mataga plot

The Stokes shift was determined as the difference in wavenumber between the lowest energy absorption and the highest energy fluorescence band. Estimates of these values obtained experimentally using the Lippert-Mataga equation.<sup>S3</sup>

$$\Delta\nu = [2(\mu_e - \mu_g)^2/hca^3]\Delta f + \nu^0$$

$$\Delta f = [(\varepsilon - 1)/(2\varepsilon + 1)] - [(n^2 - 1)/(2n^2 + 1)]$$

Where  $\Delta\nu$  is Stokes shift, the superscript “0” indicates the absence of solvent,  $\mu_g$  and  $\mu_e$  are dipole moments in the ground state and the excited state, respectively.  $h$  is the Planck constant,  $c$  represents the light speed in vacuum,  $a$  is Onsager cavity radius, here the value gets from gaussian calculation.  $\varepsilon$  and  $n$  are solvent dielectric constant and refractive index respectively.

**Table S2.** The parameter used to calculate dipole moment change ( $\Delta\mu = \mu_e - \mu_g$ ).

| Onsager cavity radius (Å) | Solvents                                      | $\Delta\nu$ | $\Delta f$ |
|---------------------------|-----------------------------------------------|-------------|------------|
| 5.98                      | MeCN                                          | 2893        | 0.305      |
|                           | CH <sub>2</sub> Cl <sub>2</sub>               | 2650        | 0.217      |
|                           | CHCl <sub>3</sub>                             | 2620        | 0.148      |
|                           | Toluene/CH <sub>2</sub> Cl <sub>2</sub> (1:1) | 1965        | 0.080      |
|                           | Toluene                                       | 1341        | 0.013      |
|                           | Hexane                                        | 1139        | 0.001      |

## Single crystal X-ray analysis of **9**

Slow evaporation using THF solution of **9** at 20 °C afforded single crystals of **9** as red platelets.

The diffraction data for **9** was recorded on a XtaLAB Synergy with a Cu-target ( $\lambda = 1.54184$  Å) equipped with a Rigaku HyPix-6000HE as the detector at 150 K in house. The diffraction images were processed by using CrysAlisPro<sup>S4</sup>. Initial structure was obtained by direct methods (SHELXT-2018/2)<sup>S5</sup> and refined by full-matrix least squares calculations on  $F^2$  (SHELXL-2018/3)<sup>S4b</sup> using the Olex2<sup>S6</sup> program package.

**2**: 2(C<sub>28</sub>H<sub>14</sub>O<sub>5</sub>)2(C<sub>4</sub>H<sub>8</sub>O), monoclinic, space group  $P2_1/n$  (No. 14),  $a = 6.97530(10)$  Å,  $b = 30.7394(6)$  Å,  $c = 22.7853(5)$  Å,  $\beta = 97.729(2)^\circ$ ,  $V = 4841.16(16)$  Å<sup>3</sup>,  $\rho_{\text{calcd}} = 1.379$  g/cm<sup>3</sup>,  $Z = 4$ , 8614 unique reflections out of 9783 with  $I > 2\sigma(I)$ , 689 parameters,  $3.479^\circ < \theta < 74.375^\circ$ ,  $R_1 = 0.1308$ ,  $wR_2 = 0.4001$ , GOF = 1.799. CCDC 2232816.

### 3) Supporting Figures

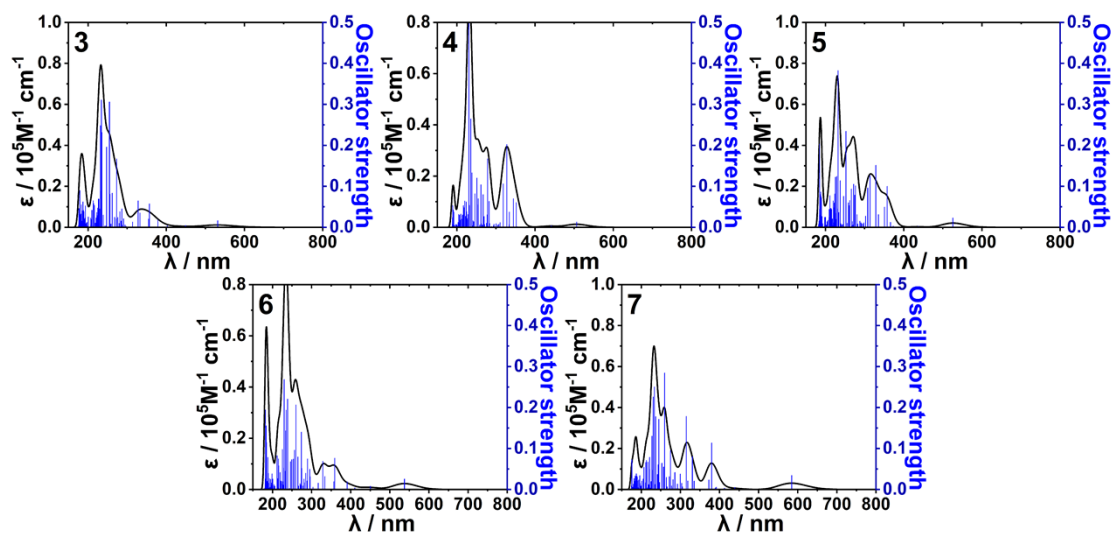

Figure S1. Simulated UV-vis spectrum of 3-8.

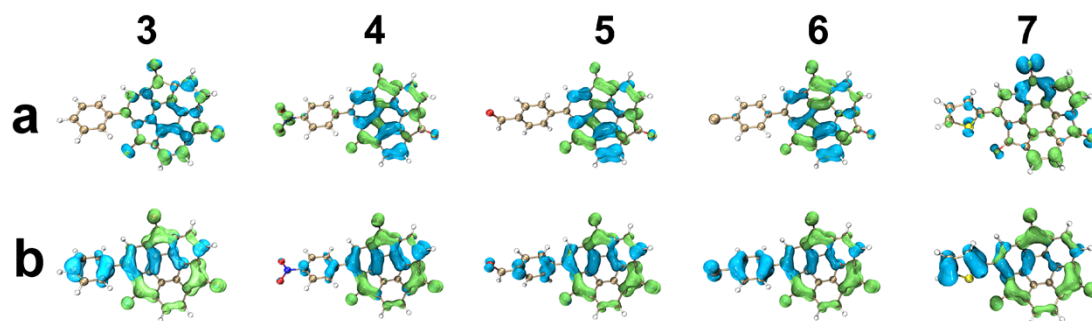

Figure S2. The distribution of hole (blue) and electron (green) of 3-7 at absorption around a) 380 nm and b) 550 nm.

Top view

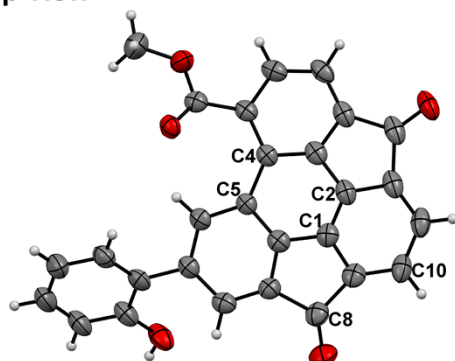

Side view

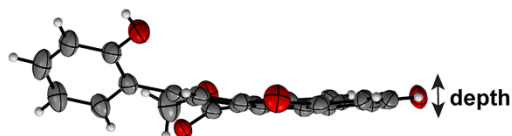

Figure S3. Thermal displacement ellipsoid plot of 9 in a crystal structure with 50% probability. The bond length of C1 to C2 is 1.340 Å and C4 to C5 is 1.512 Å, the depths of 9 at C10 and C8 are 0.331 and 0.232 Å, respectively.

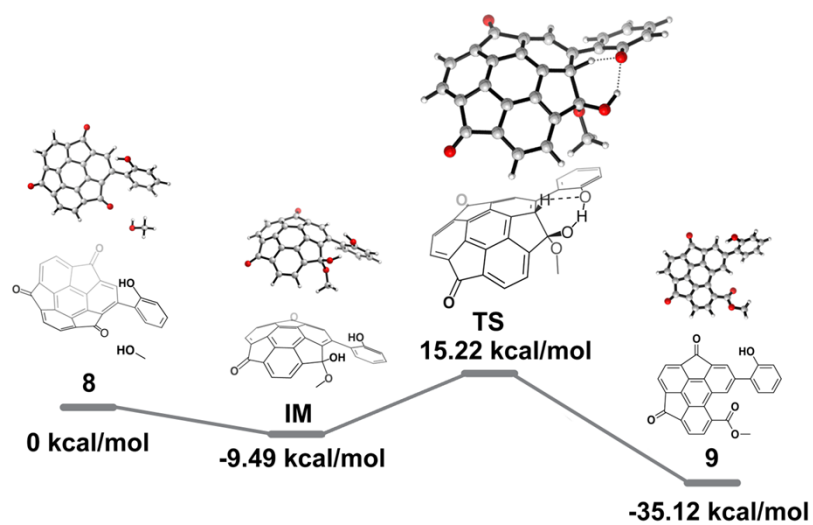

**Figure S4.** Computed free energy profile for the ring opening reaction of **8** to **9** at B3LYP/def2-TZVP level in SMD (methanol) solvent model.

#### 4) Computational Experiments

All density functional theory (DFT) and time-dependent density functional theory (TDDFT) calculations were performed with Gaussian 16 software package.<sup>S7</sup>

In the free energy profile calculation for the ring opening reaction, all the geometry optimization and transition state (TS) calculations were carried out at the B3LYP level of theory with the def2-TZVP basis set for all atoms with using the SMD model<sup>S8</sup> with methanol as the solvent. Harmonic frequency calculations were conducted at the same level of theory on the optimized geometries to check all the stationary points as minima points. Intrinsic reaction coordinate (IRC) calculations<sup>S9</sup> were carried out at the B3LYP/def2-TZVP level of theory to confirm the transition states connecting the correct reactants and products on the potential energy surface. Vibrational frequencies were computed to evaluate its zero-point vibrational energy (ZPVE) and thermal energy corrections at 298 K and to check whether each optimized structure is an energy minimum or a transition state.

For TDDFT calculation, the geometry optimization was carried out at the B3LYP level of theory with the 6-311G(d,p) basis set for all atoms. Multiwfn 3.8 was used to analyze the wave functions.<sup>S10</sup> The 3D diagrams of computed species were generated using CYLView.<sup>S11</sup>

##### Optimized cartesian coordinates of **3**

|   |           |           |           |   |           |           |           |
|---|-----------|-----------|-----------|---|-----------|-----------|-----------|
| C | 2.779182  | 0.349505  | -0.686728 | C | 4.306322  | -1.001723 | 0.491196  |
| C | 1.863728  | 1.372012  | -0.796214 | C | -3.563599 | 0.136696  | 0.060743  |
| C | 0.475536  | 1.075838  | -1.028639 | C | -3.962522 | -0.900707 | 0.914292  |
| C | 0.047132  | -0.228678 | -1.111313 | C | -5.300787 | -1.054573 | 1.261524  |
| C | 1.009148  | -1.294001 | -1.021157 | C | -5.885257 | 0.844349  | -0.097377 |
| C | 2.340682  | -1.014678 | -0.806575 | C | -4.546218 | 1.008183  | -0.436285 |
| C | 3.157705  | -1.874543 | -0.067204 | O | -1.943685 | -2.960005 | -0.121701 |
| C | 2.616909  | -3.095929 | 0.335769  | O | 0.287079  | 4.218118  | 0.54815   |
| C | 1.240144  | -3.392165 | 0.096936  | O | 5.23752   | -1.359691 | 1.162471  |
| C | 0.418279  | -2.45843  | -0.534499 | H | 3.196611  | -3.776671 | 0.94923   |
| C | -1.093483 | -2.17046  | -0.441707 | H | 0.817011  | -4.290787 | 0.531865  |
| C | -1.227433 | -0.639158 | -0.695072 | H | -2.325327 | 2.4544    | 0.243786  |
| C | -2.144341 | 0.369547  | -0.321211 | H | 3.319613  | 3.624853  | 1.264313  |
| C | -1.661711 | 1.727557  | -0.20998  | H | 4.955002  | 1.787881  | 1.465962  |
| C | -0.346915 | 2.069535  | -0.49487  | H | -3.230773 | -1.591848 | 1.305212  |
| C | 0.595885  | 3.175026  | 0.035853  | H | -5.588393 | -1.859143 | 1.92869   |
| C | 2.011328  | 2.566263  | -0.084124 | H | -6.628673 | 1.520982  | -0.503238 |
| C | 3.180699  | 2.736853  | 0.657699  | H | -4.259827 | 1.805656  | -1.112679 |
| C | 4.127768  | 1.673503  | 0.774361  | C | -6.26718  | -0.187009 | 0.757079  |
| C | 3.896835  | 0.449339  | 0.145837  | H | -7.309583 | -0.315607 | 1.025503  |

##### Optimized cartesian coordinates of **4**

|   |           |           |           |   |           |           |           |
|---|-----------|-----------|-----------|---|-----------|-----------|-----------|
| C | -3.640547 | 0.309949  | 0.584561  | C | 2.731969  | 0.256206  | 0.222903  |
| C | -2.763245 | 1.361452  | 0.725035  | C | 3.199444  | -0.780311 | -0.597864 |
| C | -1.383634 | 1.109841  | 1.044601  | C | 4.554916  | -0.917898 | -0.86489  |
| C | -0.926678 | -0.180522 | 1.187745  | C | 5.449134  | -0.016529 | -0.299903 |
| C | -1.850967 | -1.275832 | 1.064117  | C | 5.023027  | 1.01922   | 0.522065  |
| C | -3.173587 | -1.038347 | 0.762869  | C | 3.66453   | 1.151258  | 0.774228  |
| C | -3.921191 | -1.937084 | -0.003068 | N | 6.894364  | -0.163659 | -0.57918  |
| C | -3.324775 | -3.151446 | -0.343676 | O | 1.19717   | -2.86768  | 0.370941  |
| C | -1.957125 | -3.403302 | -0.017514 | O | -1.186295 | 4.22222   | -0.58702  |
| C | -1.20022  | -2.433    | 0.639857  | O | -5.937993 | -1.508752 | -1.364058 |
| C | 0.303888  | -2.103554 | 0.627896  | O | 7.654407  | 0.647414  | -0.067504 |
| C | 0.379909  | -0.562389 | 0.857162  | O | 7.239367  | -1.085931 | -1.304885 |
| C | 1.286941  | 0.464613  | 0.514386  | H | -3.848405 | -3.862215 | -0.973181 |
| C | 0.781468  | 1.805851  | 0.344653  | H | -1.485001 | -4.299062 | -0.405123 |
| C | -0.558317 | 2.11502   | 0.539744  | H | 1.452596  | 2.543595  | -0.080089 |
| C | -1.498643 | 3.182775  | -0.070987 | H | -4.156183 | 3.527459  | -1.467587 |
| C | -2.900807 | 2.535722  | -0.021257 | H | -5.724142 | 1.639489  | -1.723354 |
| C | -4.028136 | 2.656645  | -0.834396 | H | 2.507118  | -1.488073 | -1.027492 |
| C | -4.936167 | 1.563445  | -0.98243  | H | 4.926876  | -1.708777 | -1.500865 |
| C | -4.709048 | 0.359809  | -0.314254 | H | 5.749681  | 1.695856  | 0.94914   |
| C | -5.058665 | -1.109646 | -0.648513 | H | 3.322838  | 1.947491  | 1.424601  |

Optimized cartesian coordinates of 5

|   |           |           |           |   |           |           |           |
|---|-----------|-----------|-----------|---|-----------|-----------|-----------|
| C | -3.366638 | 0.19386   | 0.587664  | C | -0.34786  | 2.087869  | 0.762441  |
| C | -2.52982  | 1.257281  | 0.844729  | C | -1.309137 | 3.176974  | 0.231038  |
| C | -1.150429 | 1.022844  | 1.179219  | C | -2.689727 | 2.486895  | 0.197152  |
| C | -0.653867 | -0.259851 | 1.240389  | C | -3.799575 | 2.644325  | -0.632835 |
| C | -1.532404 | -1.369001 | 0.971868  | C | -4.664972 | 1.540156  | -0.901267 |
| C | -2.854586 | -1.149393 | 0.652478  | C | -4.411806 | 0.290752  | -0.335399 |
| C | -3.545684 | -1.993047 | -0.222384 | C | -4.697257 | -1.15042  | -0.816495 |
| C | -2.8934   | -3.141993 | -0.669455 | C | 2.968794  | 0.28984   | 0.2764    |
| C | -1.524312 | -3.37188  | -0.335213 | C | 3.72766   | -0.661598 | 0.973159  |
| C | -0.824559 | -2.447814 | 0.44006   | C | 5.069734  | -0.851287 | 0.672185  |
| C | 0.666669  | -2.066464 | 0.511715  | C | 5.682413  | -0.101426 | -0.334561 |
| C | 0.674214  | -0.566645 | 0.917375  | C | 4.93076   | 0.844276  | -1.042906 |
| C | 1.544225  | 0.50405   | 0.621764  | C | 3.594158  | 1.038024  | -0.739823 |
| C | 0.999896  | 1.836985  | 0.543681  | C | 7.114365  | -0.310685 | -0.652165 |

|   |           |           |           |   |           |           |           |
|---|-----------|-----------|-----------|---|-----------|-----------|-----------|
| O | 7.723687  | 0.290562  | -1.506082 | H | -3.939881 | 3.563068  | -1.191332 |
| O | 1.600234  | -2.762688 | 0.209651  | H | -5.435464 | 1.654352  | -1.655589 |
| O | -1.020102 | 4.265267  | -0.19024  | H | 3.263029  | -1.244516 | 1.757014  |
| O | -5.543853 | -1.509998 | -1.590709 | H | 5.64809   | -1.587061 | 1.221914  |
| H | -3.372704 | -3.800962 | -1.38481  | H | 5.415883  | 1.408807  | -1.830227 |
| H | -1.00419  | -4.1993   | -0.804745 | H | 3.018314  | 1.754425  | -1.313335 |
| H | 1.650661  | 2.635802  | 0.207971  | H | 7.615402  | -1.085511 | -0.032697 |

Optimized cartesian coordinates of **6**

|   |           |           |           |    |           |           |           |
|---|-----------|-----------|-----------|----|-----------|-----------|-----------|
| C | -3.422157 | 0.314553  | 0.610759  | C  | -4.869737 | -1.071466 | -0.625667 |
| C | -2.53228  | 1.354924  | 0.755852  | C  | 2.954601  | 0.224036  | 0.171939  |
| C | -1.150933 | 1.08602   | 1.052865  | C  | 3.431121  | -0.829862 | -0.619402 |
| C | -0.70208  | -0.209786 | 1.162705  | C  | 4.786644  | -0.959304 | -0.898917 |
| C | -1.638953 | -1.293577 | 1.03534   | C  | 5.685643  | -0.036368 | -0.375856 |
| C | -2.964194 | -1.040348 | 0.758913  | C  | 5.246621  | 1.015365  | 0.419953  |
| C | -3.73097  | -1.919548 | -0.01076  | C  | 3.8875    | 1.140881  | 0.682386  |
| C | -3.150106 | -3.132846 | -0.381122 | Cl | 7.4005    | -0.204414 | -0.720594 |
| C | -1.780147 | -3.401653 | -0.079347 | O  | 1.3797    | -2.90531  | 0.267093  |
| C | -1.005236 | -2.449056 | 0.582783  | O  | -0.948525 | 4.222842  | -0.53247  |
| C | 0.501998  | -2.132522 | 0.55363   | O  | -5.76314  | -1.450786 | -1.335053 |
| C | 0.597823  | -0.598213 | 0.8089    | H  | -3.68911  | -3.828109 | -1.015009 |
| C | 1.5128    | 0.427377  | 0.475542  | H  | -1.321225 | -4.294457 | -0.489133 |
| C | 1.009124  | 1.774552  | 0.331035  | H  | 1.677501  | 2.512654  | -0.096865 |
| C | -0.323789 | 2.092167  | 0.551446  | H  | -3.935275 | 3.569443  | -1.381435 |
| C | -1.262129 | 3.177311  | -0.028643 | H  | -5.525135 | 1.700847  | -1.645795 |
| C | -2.669627 | 2.542623  | 0.030876  | H  | 2.74725   | -1.563325 | -1.018666 |
| C | -3.807165 | 2.687249  | -0.764122 | H  | 5.142479  | -1.773201 | -1.517095 |
| C | -4.727763 | 1.605451  | -0.917247 | H  | 5.956051  | 1.721816  | 0.83078   |
| C | -4.502571 | 0.388981  | -0.271896 | H  | 3.550452  | 1.953741  | 1.315081  |

Optimized cartesian coordinates of **7**

|   |          |           |          |   |           |           |          |
|---|----------|-----------|----------|---|-----------|-----------|----------|
| C | 2.258372 | -1.143311 | 0.754288 | C | 0.011934  | -0.235016 | 1.093656 |
| C | 2.785373 | 0.195411  | 0.735152 | C | 0.907192  | -1.350866 | 0.929829 |
| C | 1.931264 | 1.265227  | 0.888608 | C | -0.22157  | 2.110029  | 0.565558 |
| C | 0.523543 | 1.042291  | 1.076667 | C | -1.541918 | 1.871442  | 0.220441 |

|   |           |           |           |   |           |           |           |
|---|-----------|-----------|-----------|---|-----------|-----------|-----------|
| C | -2.109844 | 0.541398  | 0.259368  | O | 5.172137  | -1.541669 | -1.181263 |
| C | -1.278618 | -0.537952 | 0.636311  | C | -3.489747 | 0.38273   | -0.201637 |
| C | 0.253067  | -2.427129 | 0.329427  | C | -4.159814 | 1.135351  | -1.145118 |
| C | 1.025164  | -3.361429 | -0.360065 | C | -5.516649 | 0.764392  | -1.306524 |
| C | 2.424356  | -3.145366 | -0.543377 | C | -5.882404 | -0.260267 | -0.475063 |
| C | 3.034013  | -1.998903 | -0.033686 | S | -4.567944 | -0.800077 | 0.49836   |
| C | 3.925412  | 0.277288  | -0.069224 | H | -2.152702 | 2.671051  | -0.181451 |
| C | 4.247938  | 1.519893  | -0.614922 | H | 0.551413  | -4.186431 | -0.880301 |
| C | 3.365178  | 2.630878  | -0.453029 | H | 2.973313  | -3.812476 | -1.198673 |
| C | 2.169566  | 2.487824  | 0.251254  | H | 5.096849  | 1.622427  | -1.281638 |
| C | -1.233676 | -2.033372 | 0.229387  | H | 3.571898  | 3.543616  | -1.000765 |
| C | 4.249374  | -1.169932 | -0.505484 | H | -3.682101 | 1.914106  | -1.724482 |
| C | 0.799196  | 3.186503  | 0.12946   | H | -6.191941 | 1.232069  | -2.010184 |
| O | -2.124547 | -2.722135 | -0.195023 | H | -6.845933 | -0.738339 | -0.386337 |
| O | 0.565673  | 4.272869  | -0.330912 |   |           |           |           |

Optimized cartesian coordinates of **8**

|   |           |           |           |   |           |           |           |
|---|-----------|-----------|-----------|---|-----------|-----------|-----------|
| C | -2.937357 | 0.185781  | -0.718097 | C | -4.370184 | -1.075224 | 0.66194   |
| C | -2.060946 | 1.219433  | -0.966781 | C | 3.383876  | 0.120195  | -0.115958 |
| C | -0.67254  | 0.94248   | -1.221213 | C | 4.127407  | -0.819819 | -0.844625 |
| C | -0.20615  | -0.35157  | -1.209769 | C | 5.456225  | -1.097444 | -0.552219 |
| C | -1.123676 | -1.430079 | -0.948105 | C | 6.07607   | -0.435072 | 0.503481  |
| C | -2.455778 | -1.170373 | -0.708306 | C | 5.363452  | 0.493525  | 1.253749  |
| C | -3.211518 | -1.964827 | 0.159267  | C | 4.029886  | 0.773236  | 0.9549    |
| C | -2.610582 | -3.10908  | 0.683918  | O | 1.929814  | -2.856579 | 0.046018  |
| C | -1.231459 | -3.380086 | 0.432592  | O | -0.535216 | 4.227975  | 0.04408   |
| C | -0.470184 | -2.502057 | -0.337908 | O | -5.264208 | -1.386717 | 1.4041    |
| C | 1.03258   | -2.153472 | -0.340002 | O | 3.311273  | 1.664107  | 1.70226   |
| C | 1.095072  | -0.674484 | -0.800751 | H | -3.142089 | -3.728953 | 1.397414  |
| C | 1.975998  | 0.383728  | -0.495644 | H | -0.755633 | -4.198665 | 0.961118  |
| C | 1.460187  | 1.732114  | -0.488904 | H | 2.102041  | 2.517334  | -0.11463  |
| C | 0.134388  | 2.003195  | -0.796409 | H | -3.514383 | 3.62736   | 0.915011  |
| C | -0.824389 | 3.13015   | -0.354018 | H | -5.080167 | 1.771857  | 1.365131  |
| C | -2.223046 | 2.474166  | -0.369593 | H | 3.642791  | -1.329933 | -1.667354 |
| C | -3.369895 | 2.686779  | 0.395085  | H | 6.000587  | -1.824991 | -1.141324 |
| C | -4.275822 | 1.613814  | 0.655305  | H | 7.112302  | -0.638378 | 0.747866  |
| C | -4.025604 | 0.339853  | 0.14562   | H | 5.83912   | 1.005346  | 2.085606  |

H 3.866064 1.999558 2.414189

Optimized cartesian coordinates of **9**

|   |           |           |           |   |           |           |           |
|---|-----------|-----------|-----------|---|-----------|-----------|-----------|
| C | 0.519816  | 13.174656 | 13.735952 | C | 0.773236  | 17.478651 | 8.907027  |
| C | 0.701149  | 12.376367 | 12.579307 | C | 0.797898  | 14.401007 | 11.163164 |
| C | 0.909612  | 10.503375 | 10.696063 | C | 1.872541  | 17.348418 | 8.046374  |
| H | 0.999898  | 9.760528  | 9.915802  | H | 2.648998  | 16.63651  | 8.302989  |
| C | 0.868064  | 12.898224 | 11.279697 | C | 0.475094  | 14.512304 | 13.629045 |
| C | 0.023749  | 13.303763 | 16.039057 | C | 0.167423  | 16.757649 | 14.029313 |
| H | -0.173126 | 12.862867 | 17.009591 | C | -0.024387 | 14.736403 | 15.920546 |
| O | 0.862562  | 11.126389 | 8.061659  | H | -0.256391 | 15.316014 | 16.806817 |
| O | 1.936601  | 13.058202 | 8.44888   | C | 0.718411  | 10.065373 | 12.020577 |
| C | 0.291047  | 12.500654 | 14.925632 | H | 0.65302   | 9.008061  | 12.248598 |
| C | 0.36018   | 11.019494 | 14.517885 | C | 1.992889  | 18.12105  | 6.897662  |
| C | 0.601097  | 15.115692 | 12.359465 | H | 2.858801  | 18.008526 | 6.256397  |
| O | -0.032812 | 17.824355 | 14.547936 | C | 0.678919  | 16.649781 | 10.142608 |
| O | 0.228682  | 10.040318 | 15.204425 | C | -0.231246 | 18.404416 | 8.56408   |
| C | 0.829599  | 15.254544 | 10.032645 | C | 1.193793  | 11.260359 | 6.665857  |
| H | 0.985425  | 14.846562 | 9.047167  | H | 2.275874  | 11.283089 | 6.530978  |
| C | 0.616729  | 11.04148  | 12.988793 | H | 0.763655  | 12.176778 | 6.260056  |
| C | 1.315816  | 12.108372 | 8.865924  | H | 0.762379  | 10.386965 | 6.182797  |
| O | -1.361355 | 18.585327 | 9.311022  | C | -0.112714 | 19.182189 | 7.41124   |
| H | -1.406852 | 17.907239 | 9.995225  | H | -0.908728 | 19.879664 | 7.180174  |
| C | 0.99714   | 11.85154  | 10.306027 | C | 0.995799  | 19.045012 | 6.586093  |
| C | 0.469833  | 17.287774 | 11.39931  | H | 1.077572  | 19.657467 | 5.695233  |
| C | 0.196283  | 15.360056 | 14.689063 | H | 0.373123  | 18.366351 | 11.457033 |
| C | 0.42458   | 16.490994 | 12.525726 |   |           |           |           |

Optimized cartesian coordinates of **IM**

|   |          |          |           |   |          |          |           |
|---|----------|----------|-----------|---|----------|----------|-----------|
| O | 1.964114 | 2.469421 | -0.609109 | C | 0.756632 | 5.699366 | -3.397788 |
| O | 1.987003 | 8.634479 | -4.043435 | C | 0.683201 | 4.382647 | -2.858011 |
| O | 8.171101 | 5.299393 | -1.534752 | C | 1.797404 | 3.547354 | -2.85891  |
| C | 2.259836 | 2.333601 | -1.971853 | C | 3.830453 | 2.44523  | -2.061072 |
| C | 2.554137 | 7.574813 | -4.072075 | C | 4.850767 | 2.126231 | -1.152842 |
| C | 7.191769 | 5.078874 | -2.195539 | C | 6.10031  | 2.8274   | -1.232282 |
| C | 1.937782 | 6.170675 | -3.960473 | C | 6.318163 | 3.80915  | -2.188321 |



|   |          |           |           |   |           |           |           |
|---|----------|-----------|-----------|---|-----------|-----------|-----------|
| C | 6.4329   | 6.065437  | -3.106726 | O | 1.733197  | 1.163221  | -2.527603 |
| C | 6.32945  | 7.451881  | -3.105542 | H | 4.318525  | -0.027459 | -2.151552 |
| C | 5.146096 | 8.089138  | -3.584892 | C | 0.596742  | 2.38212   | -0.219601 |
| C | 4.080156 | 7.33203   | -4.057114 | H | -0.083871 | 6.365274  | -3.247216 |
| C | 5.327517 | 4.006229  | -3.149762 | H | -0.226459 | 4.100879  | -2.347948 |
| C | 5.395116 | 5.335326  | -3.693212 | H | 6.826738  | 2.652549  | -0.448574 |
| C | 4.254813 | 5.948868  | -4.150864 | H | 7.081486  | 8.056248  | -2.614179 |
| C | 2.991419 | 5.265142  | -4.080602 | H | 5.038181  | 9.15708   | -3.442997 |
| C | 2.924433 | 3.995022  | -3.550027 | H | 5.290135  | 2.568433  | 1.479447  |
| C | 4.11792  | 3.348254  | -3.082045 | H | 4.845358  | 1.048086  | 3.370003  |
| C | 4.620098 | 1.200111  | -0.021434 | H | 3.885339  | -1.201643 | 2.94092   |
| C | 4.898323 | 1.576702  | 1.29413   | H | 3.431673  | -1.920814 | 0.60343   |
| C | 4.636745 | 0.727023  | 2.358293  | H | 0.595763  | 2.041848  | 0.814283  |
| C | 4.095431 | -0.531404 | 2.11756   | H | 0.115383  | 3.361457  | -0.270916 |
| C | 3.831798 | -0.938815 | 0.817517  | H | 0.053104  | 1.666368  | -0.836953 |
| C | 4.095084 | -0.079183 | -0.238938 | H | 2.195743  | 0.404137  | -2.130913 |
| O | 3.804256 | -0.536473 | -1.508392 |   |           |           |           |

Optimized cartesian coordinates of TS

|   |          |          |           |   |           |           |           |
|---|----------|----------|-----------|---|-----------|-----------|-----------|
| O | 2.12633  | 2.916969 | -0.46996  | C | 5.442273  | 3.892158  | -2.823184 |
| O | 2.182325 | 8.270086 | -4.731197 | C | 5.558441  | 5.16842   | -3.47213  |
| O | 7.896109 | 5.530984 | -0.872608 | C | 4.499593  | 5.683479  | -4.182655 |
| C | 2.288628 | 2.378678 | -1.765361 | C | 3.256064  | 4.967278  | -4.190737 |
| C | 2.771763 | 7.24078  | -4.538147 | C | 3.149645  | 3.76274   | -3.515249 |
| C | 7.063236 | 5.197106 | -1.673023 | C | 4.282399  | 3.164688  | -2.885012 |
| C | 2.180121 | 5.844211 | -4.317464 | C | 4.683774  | 1.057453  | 0.198943  |
| C | 0.946898 | 5.423254 | -3.832336 | C | 5.238227  | 1.08315   | 1.498006  |
| C | 0.836313 | 4.202775 | -3.113127 | C | 5.303932  | -0.044535 | 2.274785  |
| C | 1.958741 | 3.41499  | -2.874102 | C | 4.876145  | -1.275234 | 1.741574  |
| C | 3.909144 | 2.198097 | -1.881982 | C | 4.367406  | -1.357003 | 0.469249  |
| C | 4.813939 | 2.140642 | -0.723006 | C | 4.174178  | -0.194019 | -0.316763 |
| C | 5.932946 | 3.03189  | -0.633418 | O | 3.613086  | -0.28904  | -1.482098 |
| C | 6.240935 | 3.8899   | -1.658983 | O | 1.543919  | 1.238502  | -1.976293 |
| C | 6.460136 | 6.013679 | -2.811336 | H | 3.921024  | 0.977767  | -2.098283 |
| C | 6.334005 | 7.385844 | -2.999759 | C | 0.791332  | 3.128471  | -0.021362 |
| C | 5.239482 | 7.913186 | -3.742163 | H | 0.087864  | 6.081286  | -3.875074 |
| C | 4.284559 | 7.060642 | -4.28316  | H | -0.113568 | 3.966628  | -2.655361 |

|   |          |           |           |   |          |           |           |
|---|----------|-----------|-----------|---|----------|-----------|-----------|
| H | 6.526235 | 3.033307  | 0.271304  | H | 4.034505 | -2.297644 | 0.052033  |
| H | 6.980713 | 8.070744  | -2.466272 | H | 0.839713 | 3.16294   | 1.065624  |
| H | 5.082962 | 8.984472  | -3.749334 | H | 0.399648 | 4.080449  | -0.389561 |
| H | 5.576275 | 2.028788  | 1.900954  | H | 0.138008 | 2.311227  | -0.328552 |
| H | 5.68736  | 0.007151  | 3.284541  | H | 2.07397  | 0.466841  | -1.682876 |
| H | 4.941871 | -2.171063 | 2.347075  |   |          |           |           |

## 5) References

- S1 T. Amaya, S. Seki, T. Moriuchi, K. Nakamoto, T. Nakata, H. Sakane, A. Saeki, S. Tagawa and T. Hirao, *J. Am. Chem. Soc.*, **2009**, *131*, 408-409.
- S2 T. Niwa, Y. Uetake, M. Isoda, T. Takimoto, M. Nakaoka, D. Hashizume, H. Sakurai and T. Hosoya, *Nat. Catal.* **2021**, *4*, 1080-1088.
- S3 B. Bagchi, D. W. Oxtoby and G. R. Fleming, *Chem. Phys.*, **1984**, *86*, 257-267.
- S4 *CrysAlis PRO*. Rigaku Oxford Diffraction, Yarnton, **2015**.
- S5 a) G. M. Sheldrick, *Acta Crystallogr., Sect. A: Found. Adv.* **2015**, *71*, 3. b) G. M. Sheldrick, *Acta Crystallogr., Sect. C: Struct. Chem.* **2015**, *71*, 3.
- S6 O. V. Dolomanov, L. J. Bourhis, R. J. Gildea, J. A. K. Howard and H. Puschmann, *J. Appl. Crystallogr.* **2009**, *42*, 339.
- S7 Gaussian 16, Revision C.02, M. J. Frisch, G. W. Trucks, H. B. Schlegel, G. E. Scuseria, M. A. Robb, J. R. Cheeseman, G. Scalmani, V. Barone, G. A. Petersson, H. Nakatsuji, X. Li, M. Caricato, A. V. Marenich, J. Bloino, B. G. Janesko, R. Gomperts, B. Mennucci, H. P. Hratchian, J. V. Ortiz, A. F. Izmaylov, J. L. Sonnenberg, D. Williams-Young, F. Ding, F. Lipparini, F. Egidi, J. Goings, B. Peng, A. Petrone, T. Henderson, D. Ranasinghe, V. G. Zakrzewski, J. Gao, N. Rega, G. Zheng, W. Liang, M. Hada, M. Ehara, K. Toyota, R. Fukuda, J. Hasegawa, M. Ishida, T. Nakajima, Y. Honda, O. Kitao, H. Nakai, T. Vreven, K. Throssell, J. A. Montgomery, Jr., J. E. Peralta, F. Ogliaro, M. J. Bearpark, J. J. Heyd, E. N. Brothers, K. N. Kudin, V. N. Staroverov, T. A. Keith, R. Kobayashi, J. Normand, K. Raghavachari, A. P. Rendell, J. C. Burant, S. S. Iyengar, J. Tomasi, M. Cossi, J. M. Millam, M. Klene, C. Adamo, R. Cammi, J. W. Ochterski, R. L. Martin, K. Morokuma, O. Farkas, J. B. Foresman, and D. J. Fox, Gaussian, Inc., Wallingford CT, 2019.
- S8 A. V. Marenich, C. J. Cramer, D. G. Truhlar, *J. Phys. Chem. B* **2009**, *113*, 6378-6396.
- S9 K. Fukui, *Acc. Chem. Res.* **1981**, *14*, 363-368.
- S10 T. Lu and F. Chen, *J. Comput. Chem.* **2012**, *33*, 580-592.
- S11 C. Y. Legault, CYLview20; Université de Sherbrooke, Quebec, 2020; <http://www.cylview.org>.
